# Supplementary material for: First example of solid-state luminescent borasiloxane-based chiral helices assembled through N–B bonds
Source: Royal Society of Chemistry journal article supplement (doi:10.1039/d1dt00114k), 2021-01-01
Supplement: d1dt00114k1.pdf [file d1dt00114k1.pdf]

## Electronic Supplementary Information (ESI)

### First example of luminescent borasiloxane-based chiral helices assembled through N–B bonds.

Enrico Podda,<sup>a</sup> Simon J. Coles,<sup>b</sup> Peter N. Horton,<sup>b</sup> Paul D. Lickiss,<sup>c</sup> Okpara S. Bull,<sup>c</sup> James B. Orton,<sup>b</sup> Anna Pintus,<sup>a</sup> David Pugh,<sup>d</sup> M. Carla Aragoni,<sup>\*a</sup> and Robert P. Davies.<sup>\*c</sup>

<sup>a</sup>Dipartimento di Scienze Chimiche e Geologiche, Università Degli Studi di Cagliari, Cittadella Universitaria, Monserrato–Cagliari, 09042, Italy, E-mail: [aragoni@unica.it](mailto:aragoni@unica.it)

<sup>b</sup>UK National Crystallography Service, School of Chemistry, University of Southampton, Southampton, SO17 1BJ, United Kingdom

<sup>c</sup>Molecular Sciences Research Hub, Department of Chemistry, Imperial College London, White City, London, W12 0BZ, United Kingdom. E-mail: [r.davies@imperial.ac.uk](mailto:r.davies@imperial.ac.uk)

<sup>d</sup>Department of Chemistry, Britannia House, 7 Trinity Street, London, SE1 1DB, UK.

### Table of Contents

|                                                                                                                                                                                                                                                                                                                                                           |    |
|-----------------------------------------------------------------------------------------------------------------------------------------------------------------------------------------------------------------------------------------------------------------------------------------------------------------------------------------------------------|----|
| <b>Methods and materials</b> .....                                                                                                                                                                                                                                                                                                                        | 2  |
| <b>Theoretical calculations</b> .....                                                                                                                                                                                                                                                                                                                     | 3  |
| <b>Syntheses</b> .....                                                                                                                                                                                                                                                                                                                                    | 3  |
| <i>2,5-bis(pyridin-3-ylethynyl)thiophene (1)</i> .....                                                                                                                                                                                                                                                                                                    | 3  |
| General scheme for the preparation of compounds <b>2</b> and <b>3</b> .....                                                                                                                                                                                                                                                                               | 3  |
| <i>4,8-bis(4-fluorophenyl)-2,2,6,6-tetraphenyl-1,3,5,7,2,6,4,8-tetraoxadisiladiborocane (2)</i> .....                                                                                                                                                                                                                                                     | 4  |
| <i>4,8-bis(3,5-difluorophenyl)-2,2,6,6-tetraphenyl-1,3,5,7,2,6,4,8-tetraoxadisiladiborocane (3)</i> .....                                                                                                                                                                                                                                                 | 4  |
| <i>helix-[(μ<sub>2</sub>-N,N'-(2,5-bis(pyridin-3-ylethynyl)thiophene))-(μ<sub>2</sub>-4,8'-(4,8-bis(4-fluorophenyl)-2,2,6,6-tetraphenyl-1,3,5,7,2,6,4,8-tetraoxadisiladiborocane)] (4)</i> .....                                                                                                                                                          | 4  |
| <i>helix-[(μ<sub>2</sub>-N,N'-(2,5-bis(pyridin-3-ylethynyl)thiophene))-(μ<sub>2</sub>-4,8'-(4,8-bis(3,5-difluorophenyl)-2,2,6,6-tetraphenyl-1,3,5,7,2,6,4,8-tetraoxadisiladiborocane)] (5)</i> .....                                                                                                                                                      | 4  |
| <b>Table S1</b> Selected bond lengths (Å) and angles for compound <b>1</b> .....                                                                                                                                                                                                                                                                          | 5  |
| <b>Table S2</b> Crystal data and structure refinement parameters for compounds <b>1-5</b> .....                                                                                                                                                                                                                                                           | 6  |
| <b>Table S3</b> Selected bond lengths (Å) for compounds <b>2-5</b> .....                                                                                                                                                                                                                                                                                  | 7  |
| <b>Table S4</b> Selected bond angles (°) for compounds <b>2-5</b> .....                                                                                                                                                                                                                                                                                   | 8  |
| <b>Table S5</b> Optimised geometry calculated for the antiperiplanar conformation of <b>1</b> at DFT level (gas phase).....                                                                                                                                                                                                                               | 9  |
| <b>Table S6</b> Optimised geometry calculated for the periplanar conformation of <b>1</b> at DFT level (gas phase).....                                                                                                                                                                                                                                   | 10 |
| <b>Table S7</b> Optimised geometry calculated for <b>2</b> at DFT level (gas phase).....                                                                                                                                                                                                                                                                  | 11 |
| <b>Table S8</b> Optimised geometry calculated for <b>3</b> at DFT level (gas phase).....                                                                                                                                                                                                                                                                  | 13 |
| <b>Table S9</b> Optimised geometry calculated for the antiperiplanar geometry of <b>1<sub>2</sub>•2</b> at DFT level (gas phase).....                                                                                                                                                                                                                     | 15 |
| <b>Table S10</b> Optimised geometry calculated for the periplanar geometry of <b>1<sub>2</sub>•2</b> at DFT level (gas phase).....                                                                                                                                                                                                                        | 17 |
| <b>Table S11</b> Optimised geometry calculated for the antiperiplanar geometry of <b>1<sub>2</sub>•3</b> at DFT level (gas phase).....                                                                                                                                                                                                                    | 19 |
| <b>Table S12</b> Optimised geometry calculated for the periplanar geometry of <b>1<sub>2</sub>•3</b> at DFT level (gas phase).....                                                                                                                                                                                                                        | 21 |
| <b>Table S13</b> Energy <i>E</i> (eV), wavelength <i>λ</i> (nm), and oscillator strength <i>f</i> of main electronic transitions calculated for <b>1<sub>2</sub>•2</b> in the gas phase (300-400 nm), along with molecular orbital composition of the excited-state functions and molecular fragments where the involved KS-MOs are mainly localized..... | 22 |
| <b>Figure S1</b> Ellipsoid draw (30%) and numbering scheme for compound <b>1</b> .....                                                                                                                                                                                                                                                                    | 23 |
| <b>Figure S2</b> Ellipsoid draw (30%) and numbering scheme for compound <b>2</b> .....                                                                                                                                                                                                                                                                    | 23 |
| <b>Figure S3</b> Ellipsoid draw (30%) and numbering scheme for compound <b>3</b> .....                                                                                                                                                                                                                                                                    | 24 |
| <b>Figure S4</b> Asymmetric unit and numbering scheme for compound <b>4</b> .....                                                                                                                                                                                                                                                                         | 24 |

## Electronic Supplementary Information (ESI)

|                                                                                                                                 |    |
|---------------------------------------------------------------------------------------------------------------------------------|----|
| Figure S5 Asymmetric unit and numbering scheme for compound <b>5</b> .....                                                      | 25 |
| FT-IR spectra .....                                                                                                             | 25 |
| Figure S6 FT-IR spectrum of <b>1</b> .....                                                                                      | 25 |
| Figure S7 FT-IR spectrum of <b>2</b> .....                                                                                      | 26 |
| Figure S8 FT-IR spectrum of <b>3</b> .....                                                                                      | 26 |
| Figure S9 FT-IR spectrum of <b>4</b> .....                                                                                      | 27 |
| Figure S10 FT-IR spectrum of <b>5</b> .....                                                                                     | 27 |
| Figure S11 Diffuse reflectance measurements for compounds <b>1-5</b> .....                                                      | 28 |
| NMR Spectra .....                                                                                                               | 28 |
| Figure S12 $^1\text{H}$ -NMR (400 MHz, $\text{DMSO-d}_6$ ) of <b>1</b> .....                                                    | 29 |
| Figure S13 $^{13}\text{C}\{^1\text{H}\}$ NMR (101 MHz, $\text{DMSO-d}_6$ ) of <b>1</b> .....                                    | 29 |
| Figure S14 $^1\text{H}$ - $^1\text{H}$ COSY NMR of <b>1</b> .....                                                               | 30 |
| Figure S15 $^1\text{H}$ -NMR (400 MHz, $\text{CDCl}_3$ ) of <b>2</b> .....                                                      | 30 |
| Figure S16 $^{13}\text{C}\{^1\text{H}\}$ NMR (101 MHz, $\text{CDCl}_3$ ) of <b>2</b> .....                                      | 31 |
| Figure S17 $^{11}\text{B}\{^1\text{H}\}$ NMR (128 MHz, $\text{CDCl}_3$ ) of <b>2</b> .....                                      | 31 |
| Figure S18 $^{19}\text{F}\{^1\text{H}\}$ NMR (377 MHz, $\text{CDCl}_3$ ) of <b>2</b> .....                                      | 32 |
| Figure S19 $^{29}\text{Si}\{^1\text{H}\}$ NMR (80 MHz, $\text{CDCl}_3$ ) of <b>2</b> .....                                      | 32 |
| Figure S20 $^1\text{H}$ -NMR (400 MHz, $\text{CDCl}_3$ ) of <b>3</b> .....                                                      | 33 |
| Figure S21 $^{13}\text{C}\{^1\text{H}\}$ NMR (101 MHz, $\text{CDCl}_3$ ) of <b>3</b> .....                                      | 33 |
| Figure S22 $^{11}\text{B}\{^1\text{H}\}$ NMR (128 MHz, $\text{CDCl}_3$ ) of <b>3</b> .....                                      | 34 |
| Figure S23 $^{19}\text{F}\{^1\text{H}\}$ NMR (377 MHz, $\text{CDCl}_3$ ) of <b>3</b> .....                                      | 34 |
| Figure S24 $^{29}\text{Si}$ - $^1\text{H}$ HMBC of <b>3</b> .....                                                               | 35 |
| Figure S25 $^{13}\text{C}$ CP MAS of <b>4</b> .....                                                                             | 35 |
| Figure S26 $^{13}\text{C}$ CP MAS of <b>5</b> .....                                                                             | 36 |
| Figure S27 TOF MS ES+ of <b>1</b> .....                                                                                         | 37 |
| Powder X-ray Diffraction analysis .....                                                                                         | 38 |
| Figure S28 Comparison between the experimental(red) and calculated(blue) PXRD pattern of compound <b>4</b> .....                | 38 |
| Figure S29 Comparison between the experimental(red) and calculated(blue) PXRD pattern of compound <b>5</b> .....                | 38 |
| Figure S30 Relative total electronic energy variation calculated as a function of the pyridine ring rotation for <b>1</b> ..... | 39 |
| Figure S31 Isosurface drawings of selected frontier Kohn–Sham molecular orbitals calculated for <b>1-3</b> .....                | 40 |
| References .....                                                                                                                | 41 |

### Methods and materials

All chemicals, reagents and solvents were purchased from Sigma Aldrich, TCI, Fluorochem or VWR Chemicals and used as received without any further purification if not otherwise stated. Diethylamine was distilled over  $\text{LiAlH}_4$  and degassed prior use.

Melting point measurements were carried in capillaries, using FALC melting point device mod. C. (up to 300 °C). Elemental analyses were performed with an EA1108 CHNS-O Fisons instrument.

NMR spectroscopy analysis in solution and in solid-state were performed on samples **1-5** in order to investigate the nature and the self-assembly phenomena of the products. The polypyridyl ligand **1** was characterized by  $^1\text{H}$ ,  $^{13}\text{C}$  and  $^1\text{H}$ - $^1\text{H}$  COSY NMR (Figure S1-S3), the borasiloxanes **2** and **3** were characterized by  $^1\text{H}$ ,  $^{11}\text{B}$ ,  $^{13}\text{C}$ ,  $^{19}\text{F}$  and  $^{29}\text{Si}$  NMR techniques in solution (Figure S4-S14).  $^1\text{H}$ ,  $^{13}\text{C}\{^1\text{H}\}$ ,  $^{11}\text{B}\{^1\text{H}\}$ ,  $^{19}\text{F}\{^1\text{H}\}$ ,  $^{29}\text{Si}\{^1\text{H}\}$   $^1\text{H}$ - $^1\text{H}$  COSY,  $^{29}\text{Si}$ - $^1\text{H}$  HMBC NMR spectra were recorded on Bruker AVANCE III HD 400 MHz spectrometer in  $\text{CDCl}_3$  or  $\text{DMSO-d}_6$  as solvent. The chemical shifts ( $\delta$ ) are reported in ppm and referenced against the solvent residue or by means of external standard such as:  $\text{BF}_3\cdot\text{Et}_2\text{O}$ ,  $\text{CFCl}_3$  and  $\text{Si}(\text{CH}_3)_4$  for  $^{11}\text{B}$ ,  $^{19}\text{F}$  and  $^{29}\text{Si}$  nuclei respectively.  $^{13}\text{C}$  CPMAS solid-state NMR spectra were recorded on a Bruker Avance III HD 600 MHz (14.1 T) spectrometer at a frequency of 150.9 MHz, using a 2.5 mm probehead with 15.5 kHz spinning frequency.

Single-crystal X-ray diffraction data of **1** and **5** were collected on a Rigaku 007HF diffractometer, equipped with Varimax confocal mirrors, an AFC11 goniometer, a HyPix 6000 detector and an Oxford Cryosystems low temperature device, operating at 100K. **4** was collected on a Rigaku FRE+ diffractometer, equipped with HF Varimax confocal mirrors, an AFC12 goniometer, an HG Saturn 724+ CCD area detector and an Oxford Cryosystems low temperature device, operating at 100K. Data collection and processing for **1**, **4** and **5**, performed using CrysAlisPro (Rigaku Oxford Diffraction).<sup>1</sup> These structures then solved with the ShelXT,<sup>2</sup> structure solution program (using the

### Electronic Supplementary Information (ESI)

Intrinsic Phasing solution method) and by using Olex2,<sup>3</sup> as the graphical interface with their models refined with version 2018/3 of ShelXL,<sup>4</sup> using Least Squares minimisation.

Single-crystal X-ray diffraction data of **2** and **3** were collected on an Oxford Diffraction Xcalibur 3E (Mo K $\alpha$  radiation, 0.71075 Å). Datasets were processed using Crystalis Pro,<sup>5</sup> solutions then solved and refined using SHELX-97 and SHELX-TL,<sup>6</sup> as well as Olex-2,<sup>3</sup> and WinGX.<sup>7</sup>

Powder X-ray Diffraction analysis performed on a Rigaku Miniflex 600 equipped with CuK $\alpha$  radiation with a scan step of 0.02 ° and a scan speed of 0.03 °/min in the range from 5 to 30 ° in continuous mode. Experimental patterns were then compared with calculated patterns from single crystal X-ray diffraction analysis by means of CrystalDiffract version 6.8.2.

### Theoretical calculations

Theoretical calculations performed at the density functional theory (DFT)<sup>8</sup> level with the Gaussian 16 (Rev. B.01)<sup>9</sup> suite of programs on an IBM x3755 server with four 12-core processors and 64 Gb of RAM (OS: SUSE Linux Enterprise Server 11 SP3). The mPW1PW functional<sup>10</sup> was adopted, in combination with the full-electron split valence basis sets (BSs) including polarization functions (def2-SVP),<sup>11,12</sup> obtained from Basis Set Exchange and Basis Set EMSL Library.<sup>13</sup>

Geometry optimizations performed starting from structural data. Fine numerical integration grids (*Integral=ultrafine* keyword) were used, and the nature of the minima of each optimized structure was verified by harmonic frequency calculations (*freq=raman* keyword). PES scans performed on **1** by imposing the rotation of the pyridine rings (between 0 and 180 °, steps of 10 °) and optimizing the resulting geometry at each rotational step (*opt=modredundant* keyword). A natural population analysis was carried out at the optimized geometries using the natural bonding orbital (NBO) partitioning scheme.<sup>14</sup> Investigation of the optimized structures and the shapes of Kohn–Sham molecular orbitals employed the programs GaussView 6.0.16,<sup>15</sup> Molden 5.9,<sup>16</sup> and Chemissian 4.53.<sup>17</sup>

### Syntheses

#### 2,5-bis(pyridin-3-ylethynyl)thiophene (**1**)

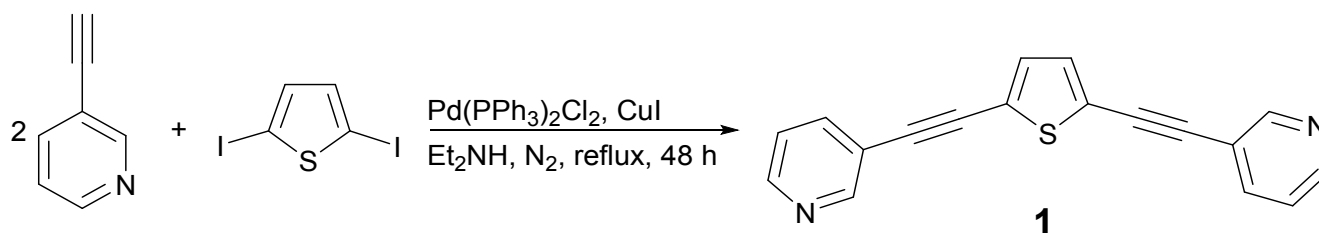

3-ethynylpyridine (0.518 g; 5.02 mmol), 2,5-diiodothiophene (0.841 g; 2.50 mmol), copper(I) iodide (0.025 g; 0.13 mmol) and Pd(PPh<sub>3</sub>)<sub>2</sub>Cl<sub>2</sub> (0.089 g; 0.13 mmol) were placed in a three-necked 50 mL round bottom flask, then evacuated and backfilled with nitrogen three times. Freshly distilled and degassed diethylamine (25 mL) was added *via* canula, this mixture then heated to reflux and for 48 h, under a nitrogen atmosphere. A NH<sub>4</sub>Cl saturated aqueous solution (100 mL) was added to the mixture and extracted with ethyl acetate (3x 25 mL). The organic phase was dried over MgSO<sub>4</sub>, filtered and concentrated to give the crude product as a red solid. Purification of the product was achieved by silica gel column chromatography (CH<sub>2</sub>Cl<sub>2</sub>/EtOAc 2:1). (pale-yellow solid; 501 mg; 1.75 mmol; 70 %) M.p. 98-100 °C. Elemental analysis calculated (%) for C<sub>18</sub>H<sub>10</sub>N<sub>2</sub>S: C 75.50; H 3.52; N 9.78; S 11.20; found C 75.58; H 3.53; N 9.61, S 11.05. FT-IR (KBr, 4000-400 cm<sup>-1</sup>) 3076w, 3053w, 3024, 2202m, 1581w, 1558m, 1520m, 1471s, 1439w, 1404s, 1327w, 1248w, 1188m, 1120m, 1095w, 1043w, 1022s, 949w, 918w, 802vs, 721w, 700vs, 642m, 615w, 538m, 515w, 461w, 411w cm<sup>-1</sup>. <sup>1</sup>H NMR (400 MHz, DMSO-d<sub>6</sub>) δ 8.78 (dd, *J* = 2.2, 0.9 Hz, 2H, Py), 8.62 (dd, *J* = 4.9, 1.7 Hz, 2H, Py), 8.06 – 7.98 (m, 2H, Py), 7.51 – 7.47 (m, 4H, Py/thiophene). <sup>13</sup>C{<sup>1</sup>H} NMR (101 MHz, DMSO-d<sub>6</sub>) δ 151.55, 149.51, 138.60, 133.85, 123.69, 123.47, 118.57, 91.30, 84.70.

General scheme for the preparation of compounds 2 and 3.

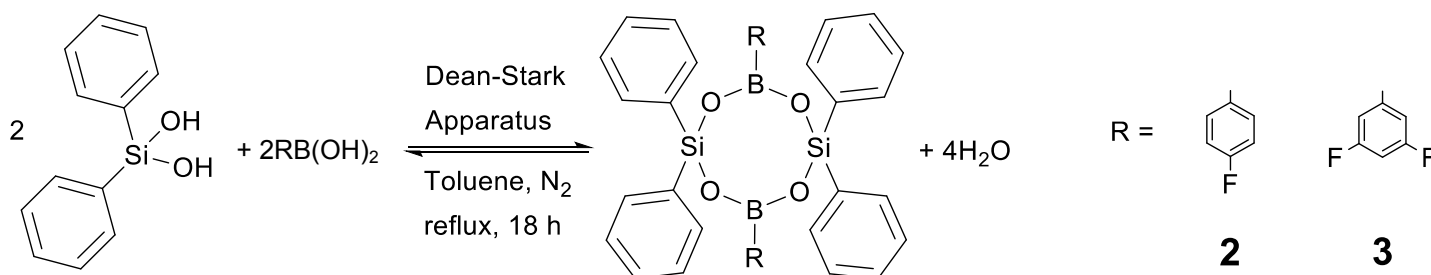

**4,8-bis(4-fluorophenyl)-2,2,6,6-tetraphenyl-1,3,5,7,2,6,4,8-tetraoxadisiladiborocane (2)**

Diphenylsilanediol (1.007 g; 4.66 mmol), 4-fluorophenylboronic acid (0.650 g; 4.65 mmol) were dissolved in dry toluene (50 mL) in a 100 mL round-bottom flask equipped with a Dean-Stark apparatus, this mixture then heated to reflux for overnight, under nitrogen atmosphere. After discarding the aqueous phase, the solvent removed under reduced pressure, resulting in a white powder (subsequently purified by recrystallization from a 2:1 diethyl ether/dichloromethane mixture). Colourless crystals were collected by filtration and stored under nitrogen atmosphere (1.44 g; 2.25 mmol; 97 %).  $^1\text{H}$  NMR (400 MHz,  $\text{CDCl}_3$ )  $\delta$  8.07 – 8.00 (m, 4H, *o*- $\text{FC}_6\text{H}_4\text{B}$ ), 7.71 – 7.66 (m, 8H, *o*- $\text{C}_6\text{H}_5\text{Si}$ ), 7.45 – 7.38 (m, 4H, *p*- $\text{C}_6\text{H}_5\text{Si}$ ), 7.36 – 7.29 (m, 8H, *m*- $\text{C}_6\text{H}_5\text{Si}$ ), 7.15 – 7.08 (m, 4H, *m*- $\text{FC}_6\text{H}_4\text{B}$ ).  $^{13}\text{C}\{^1\text{H}\}$  NMR (101 MHz,  $\text{CDCl}_3$ )  $\delta$  165.67 (d,  $^1J_{\text{C-F}} = 251$  Hz), 138.03 (d,  $^4J_{\text{H-F}} = 8$  Hz), 134.20, 133.29, 130.88, 128.28, 115.21 (d,  $^3J_{\text{H-F}} = 20$  Hz).  $^{11}\text{B}\{^1\text{H}\}$  NMR (128 MHz,  $\text{CDCl}_3$ )  $\delta$  25.55.  $^{19}\text{F}\{^1\text{H}\}$  NMR (377 MHz,  $\text{CDCl}_3$ )  $\delta$  -107.93.  $^{29}\text{Si}\{^1\text{H}\}$  NMR (80 MHz,  $\text{CDCl}_3$ )  $\delta$  -44.62.

**4,8-bis(3,5-difluorophenyl)-2,2,6,6-tetraphenyl-1,3,5,7,2,6,4,8-tetraoxadisiladiborocane (3)**

Diphenylsilanediol (1.371 g; 6.33 mmol) and 3,5-difluorophenylboronic acid (1.002 g; 6.33 mmol) were dissolved in dry toluene (50 mL) in a 100 mL round-bottom flask equipped with a Dean-Stark apparatus, the mixture then heated to reflux for overnight under nitrogen atmosphere. After discarding the aqueous phase, and the solvent removed under reduced pressure to give a white powder (subsequently purified by recrystallization from a 2:1 diethyl ether/dichloromethane mixture). Colourless crystals were collected by filtration and stored under nitrogen atmosphere (1.55 g; 2.29 mmol; 72 %). M.p. 151-152 °C; Elemental analysis calculated (%) for  $\text{C}_{36}\text{H}_{26}\text{B}_2\text{F}_4\text{O}_4\text{Si}_2$ : C, 63.93; H, 3.87; Found: C, 63.83; H, 4.06. FT-IR (KBr, 4000-400  $\text{cm}^{-1}$ ) 3072w, 3053w, 3028w, 3005w, 2962w, 1618, 1585ms, 1427vs, 1385s, 1321vs, 1257vs, 1186w, 1119vs, 1018m, 982s, 874m, 852m, 823m, 802m, 739m, 721s, 696vs, 596w, 580ms, 517s, 488ms, 405m  $\text{cm}^{-1}$ .  $^1\text{H}$  NMR (400 MHz,  $\text{CDCl}_3$ )  $\delta$  7.69 – 7.64 (m, 8H, *o*- $\text{C}_6\text{H}_5\text{Si}$ ), 7.52 – 7.42 (m, 8H, *p*- $\text{C}_6\text{H}_5\text{Si}$ , *o*- $\text{F}_2\text{C}_6\text{H}_3\text{B}$ ), 7.40 – 7.33 (m, 8H, *m*- $\text{C}_6\text{H}_5\text{Si}$ ), 6.95 (tt,  $^3J_{\text{H-F}} = 8.9$  Hz,  $^4J_{\text{H-H}} = 2.4$  Hz, 2H, *p*- $\text{F}_2\text{C}_6\text{H}_3\text{B}$ ).  $^{13}\text{C}\{^1\text{H}\}$  NMR (101 MHz,  $\text{CDCl}_3$ )  $\delta$  163.11 (dd,  $^1J_{\text{C-F}} J = 249.8$ ,  $^3J_{\text{C-F}} 11.0$  Hz), 134.48, 134.13, 132.49, 131.20, 128.45, 118.02 – 117.21 (m), 107.29 (t,  $^2J_{\text{C-F}} = 25.0$  Hz).  $^{11}\text{B}\{^1\text{H}\}$  NMR (128 MHz,  $\text{CDCl}_3$ )  $\delta$  25.49.  $^{19}\text{F}\{^1\text{H}\}$  NMR (377 MHz,  $\text{CDCl}_3$ )  $\delta$  -110.40.  $^{29}\text{Si}$ - $^1\text{H}$  HMBC NMR (80 MHz,  $\text{CDCl}_3$ )  $\delta$  -43.99.

**helix-[( $\mu_2$ -*N,N'*-(2,5-bis(pyridin-3-ylethynyl)thiophene))-( $\mu_2$ -4,8'-(4,8-bis(4-fluorophenyl)-2,2,6,6-tetraphenyl-1,3,5,7,2,6,4,8-tetraoxadisiladiborocane)] (4)**

Ligand 1 (11.4 mg; 40  $\mu\text{mol}$ ) and compound 2 (25.6 mg; 40  $\mu\text{mol}$ ) were dissolved in 3 mL of a dry dichloromethane/diethyl ether (1:2) mixture upon sonication for 10 min. The yellowish clear solution was left to crystallize overnight at room temperature. Colourless crystals suitable for X-ray diffraction were collected by suction filtration and washed with diethyl ether (yield: 32.0 mg; 3.45 mmol; 86 %). Mp: 160 °C. Elemental analysis calculated (%) for  $\text{C}_{54}\text{H}_{38}\text{B}_2\text{F}_2\text{N}_2\text{O}_4\text{SSi}_2$ : C, 69.98; H, 4.13; N, 3.02; S, 3.46. Found: C, 70.01; H, 4.17; N, 2.95; S, 3.38. FT-IR (KBr, 4000–400  $\text{cm}^{-1}$ ): 3089w, 3051w, 3047w, 3024w, 2220mw, 1587m, 1497m, 1477m, 1429m, 1414m, 1387w, 1329w, 1309w, 1273w, 1188-1178vs ( $\nu_{\text{as}}\text{Si-O} + \nu_{\text{sym}}\text{B-O}$ ), 1120-1111vs ( $\nu_{\text{sym}}\text{Si-O} + \nu_{\text{as}}\text{B-O}$ ), 1097s, 1063s, 1016m, 937w, 899w, 877w, 866w, 835m, 816m, 802m, 750ms, 735s, 706s, 677s, 648m, 634w, 563m, 561ms, 534mw,

### Electronic Supplementary Information (ESI)

496ms, 498ms, 428mw  $\text{cm}^{-1}$ .  $^{13}\text{C}$  CP/MAS NMR (151 MHz)  $\delta$  164.21, 162.76, 147.74, 145.69, 140.12, 139.38, 134.25, 131.12, 129.22, 127.08, 125.45, 121.74, 114.41, 89.75, 86.85 ppm.

#### *helix-[( $\mu_2$ -N,N'-(2,5-bis(pyridin-3-ylethynyl)thiophene))-( $\mu_2$ -4,8'-(4,8-bis(3,5-difluorophenyl)-2,2,6,6-tetraphenyl-1,3,5,7,2,6,4,8-tetraoxadisiladiborocane)] (5)*

Ligand **1** (11.5 mg; 40  $\mu\text{mol}$ ) and compound **3** (27.1 mg; 40  $\mu\text{mol}$ ) were dissolved in 3 mL of a dry dichloromethane/diethyl ether (1:2) mixture upon sonication for 10 min. The yellowish clear solution was left to crystallize for overnight at room temperature. Colourless crystals suitable for X-ray diffraction were collected by suction filtration and washed with diethyl ether (yield: 33.5 mg; 3.48 mmol; 87 %) Mp: 175 °C. Elemental analysis calculated (%) for  $\text{C}_{54}\text{H}_{36}\text{B}_2\text{F}_4\text{N}_2\text{O}_4\text{SSi}_2$ : C, 67.37; H, 3.77; N, 2.91; S, 3.33. Found: C, 67.41; H, 3.80; N, 2.81; S, 3.28. FT-IR (KBr, 4000–400  $\text{cm}^{-1}$ ): 3120w, 3089w, 3066w, 3047w, 2212mw, 1612m, 1579ms, 1522w, 1477m, 1416s, 1414s, 1340m, 1325m, 1284vs, 1188s, 1144-1105vs ( $\nu_{\text{as}}\text{Si-O} + \nu_{\text{sym}}\text{B-O}$ ), 1065s, 976s, 962m, 912w, 839mw, 829m, 806m, 719vs, 706s, 652m, 598m, 553ms, 521m, 498s, 417m  $\text{cm}^{-1}$ .  $^{13}\text{C}$  CP/MAS NMR (151 MHz)  $\delta$  164.48, 162.96, 157.12, 145.86, 140.18, 139.45, 138.03, 134.44, 133.35, 129.50, 128.00, 126.87, 125.18, 121.61, 115.50, 102.05, 90.46, 86.82 ppm.

**Table S1** Selected bond lengths ( $\text{\AA}$ ) and angles ( $^\circ$ ) for compound **1**. Centroids and planes are identified by numbers (1-3) and letters (a-c), respectively.

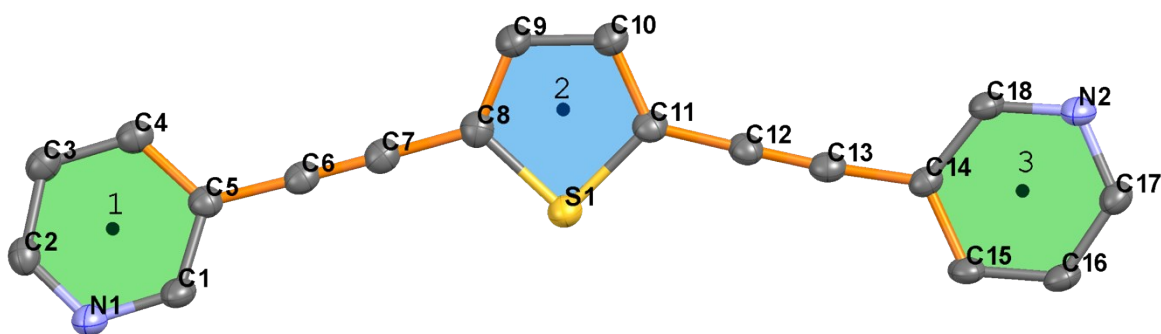

|                    |        |
|--------------------|--------|
| 1–2–3              | 155.07 |
| a–b                | 17.57  |
| a–c                | 12.05  |
| b–c                | 5.53   |
| C5–C6–C7           | 178.17 |
| C8–C7–C6           | 178.58 |
| C7–C8–S1           | 121.35 |
| C12–C11–S1         | 121.67 |
| C14–C13–C12        | 176.02 |
| C11–C12–C13        | 178.44 |
| C4–C5–C8–C9        | 17.49  |
| C10–C11–C14–C15    | 173.64 |
| $d_{\text{N1-N2}}$ | 14.530 |

**Electronic Supplementary Information (ESI)**

**Table S2** Crystal data and structure refinement parameters for compounds 1-5

| <b>Compound</b>              | <b>1</b>                                         | <b>2</b>                                                                                     | <b>3</b>                                                                                     | <b>4</b>                                                                                                     | <b>5</b>                                                                                                     |
|------------------------------|--------------------------------------------------|----------------------------------------------------------------------------------------------|----------------------------------------------------------------------------------------------|--------------------------------------------------------------------------------------------------------------|--------------------------------------------------------------------------------------------------------------|
| Formula                      | C <sub>18</sub> H <sub>10</sub> N <sub>2</sub> S | C <sub>36</sub> H <sub>28</sub> B <sub>2</sub> F <sub>2</sub> O <sub>4</sub> Si <sub>2</sub> | C <sub>36</sub> H <sub>26</sub> B <sub>2</sub> F <sub>4</sub> O <sub>4</sub> Si <sub>2</sub> | C <sub>54</sub> H <sub>36</sub> B <sub>2</sub> F <sub>4</sub> N <sub>2</sub> O <sub>4</sub> SSi <sub>2</sub> | C <sub>54</sub> H <sub>38</sub> B <sub>2</sub> F <sub>2</sub> N <sub>2</sub> O <sub>4</sub> SSi <sub>2</sub> |
| $D_{calc.}/g\text{ cm}^{-3}$ | 1.356                                            | 1.286                                                                                        | 1.380                                                                                        | 1.391                                                                                                        | 1.349                                                                                                        |
| $\mu/\text{mm}^{-1}$         | 1.980                                            | 0.157                                                                                        | 0.172                                                                                        | 1.690                                                                                                        | 0.183                                                                                                        |
| Formula Weight               | 286.34                                           | 640.38                                                                                       | 676.37                                                                                       | 962.71                                                                                                       | 926.72                                                                                                       |
| Colour                       | colourless                                       | colourless                                                                                   | colourless                                                                                   | pale yellow                                                                                                  | colourless                                                                                                   |
| Shape                        | plate                                            | block                                                                                        | block                                                                                        | block                                                                                                        | prism                                                                                                        |
| Size/mm <sup>3</sup>         | 0.15x0.08x0.02                                   | 0.30x0.25x0.15                                                                               | 0.30x0.20x0.20                                                                               | 0.19x0.16x0.06                                                                                               | 0.06x0.05x0.025                                                                                              |
| $T/\text{K}$                 | 100(2)                                           | 173(2)                                                                                       | 173(2)                                                                                       | 100(2)                                                                                                       | 100(2)                                                                                                       |
| Crystal System               | orthorhombic                                     | triclinic                                                                                    | triclinic                                                                                    | tetragonal                                                                                                   | tetragonal                                                                                                   |
| Flack Parameter              | -                                                | -                                                                                            | -                                                                                            | -0.005(7)                                                                                                    | -0.06(4)                                                                                                     |
| Hooft Parameter              | -                                                | -                                                                                            | -                                                                                            | -0.014(5)                                                                                                    | -0.07(4)                                                                                                     |
| Space Group                  | <i>Pbcn</i>                                      | <i>P</i> -1                                                                                  | <i>P</i> -1                                                                                  | <i>P</i> 4 <sub>3</sub>                                                                                      | <i>P</i> 4 <sub>3</sub> 2 <sub>1</sub> 2                                                                     |
| $a/\text{\AA}$               | 34.6428(11)                                      | 8.5686(6)                                                                                    | 8.7686(3)                                                                                    | 19.62160(10)                                                                                                 | 13.8634(2)                                                                                                   |
| $b/\text{\AA}$               | 7.5712(2)                                        | 9.8331(10)                                                                                   | 12.6193(5)                                                                                   | 19.62160(10)                                                                                                 | 13.8634(2)                                                                                                   |
| $c/\text{\AA}$               | 10.6915(2)                                       | 11.3579(8)                                                                                   | 15.6914(7)                                                                                   | 23.8883(2)                                                                                                   | 23.7340(4)                                                                                                   |
| $\alpha/^\circ$              | 90                                               | 112.478(8)                                                                                   | 71.173(4)                                                                                    | 90                                                                                                           | 90                                                                                                           |
| $\beta/^\circ$               | 90                                               | 108.622(6)                                                                                   | 82.544(3)                                                                                    | 90                                                                                                           | 90                                                                                                           |
| $\gamma/^\circ$              | 90                                               | 91.091(7)                                                                                    | 89.851(3)                                                                                    | 90                                                                                                           | 90                                                                                                           |
| $V/\text{\AA}^3$             | 2804.25(13)                                      | 827.02(13)                                                                                   | 1628.09(12)                                                                                  | 9197.17(12)                                                                                                  | 4561.53(15)                                                                                                  |
| $Z$                          | 8                                                | 1                                                                                            | 2                                                                                            | 8                                                                                                            | 4                                                                                                            |
| $Z'$                         | 1                                                |                                                                                              |                                                                                              | 2                                                                                                            | 0.5                                                                                                          |
| Wavelength/ $\text{\AA}$     | 1.54178                                          | 0.71075                                                                                      | 0.71075                                                                                      | 1.54178                                                                                                      | 0.71075                                                                                                      |
| Radiation type               | CuK $\alpha$                                     | MoK $\alpha$                                                                                 | MoK $\alpha$                                                                                 | CuK $\alpha$                                                                                                 | MoK $\alpha$                                                                                                 |
| $\theta_{min}/^\circ$        | 2.551                                            | 3.124                                                                                        | 2.958                                                                                        | 2.252                                                                                                        | 1.701                                                                                                        |
| $\theta_{max}/^\circ$        | 68.235                                           | 25.022                                                                                       | 25.023                                                                                       | 68.246                                                                                                       | 27.484                                                                                                       |
| Measured Refl.               | 13192                                            | 4382                                                                                         | 8704                                                                                         | 49836                                                                                                        | 52919                                                                                                        |
| Independent Refl.            | 2556                                             | 2890                                                                                         | 5686                                                                                         | 16155                                                                                                        | 5236                                                                                                         |
| Reflections with $I > 2(I)$  | 2277                                             |                                                                                              |                                                                                              | 15953                                                                                                        | 4550                                                                                                         |
| $R_{int}$                    | 0.0589                                           | 0.0164                                                                                       | 0.0201                                                                                       | 0.0270                                                                                                       | 0.0773                                                                                                       |
| Parameters                   | 190                                              | 208                                                                                          | 433                                                                                          | 1312                                                                                                         | 334                                                                                                          |
| Restraints                   | -                                                | -                                                                                            | -                                                                                            | 444                                                                                                          | 582                                                                                                          |
| Largest Peak                 | 0.560                                            | 0.229                                                                                        | 0.462                                                                                        | 0.365                                                                                                        | 0.259                                                                                                        |
| Deepest Hole                 | -0.555                                           | -0.297                                                                                       | -0.451                                                                                       | -0.219                                                                                                       | -0.220                                                                                                       |
| GooF                         | 1.161                                            | 1.026                                                                                        | 1.048                                                                                        | 1.021                                                                                                        | 1.028                                                                                                        |
| $wR_2$ (all data)            | 0.1964                                           | 0.1018                                                                                       | 0.1209                                                                                       | 0.0883                                                                                                       | 0.0837                                                                                                       |
| $wR_2$                       | 0.1913                                           | 0.0941                                                                                       | 0.1085                                                                                       | 0.0879                                                                                                       | 0.0794                                                                                                       |
| $R_1$ (all data)             | 0.0848                                           | 0.0714                                                                                       | 0.0832                                                                                       | 0.0330                                                                                                       | 0.0474                                                                                                       |
| $R_1$                        | 0.0767                                           | 0.0467                                                                                       | 0.0498                                                                                       | 0.0326                                                                                                       | 0.0368                                                                                                       |

**Electronic Supplementary Information (ESI)**

**Table S3** Selected bond lengths (Å) for compounds 2-5

| <b>2</b>  |           | <b>3</b>  |            | <b>4</b>  |            | <b>5</b>     |            |
|-----------|-----------|-----------|------------|-----------|------------|--------------|------------|
| Si1-O1    | 1.625(14) | Si1-O1    | 1.639(19)  | Si1-O1    | 1.6067(17) | Si1-O1       | 1.6000(3)  |
| Si1-O2    | 1.618(16) | Si1-O2    | 1.616(16)  | Si1-O2    | 1.6179(16) | Si1-O2       | 1.623(3)   |
|           |           |           |            |           |            | Si2-O3       | 1.611(3)   |
|           |           |           |            |           |            | Si2-O4       | 1.612(3)   |
|           |           |           |            |           |            | Si61-O61     | 1.619(3)   |
|           |           |           |            |           |            | Si61-O62     | 1.605(3)   |
|           |           |           |            |           |            | Si62-O63     | 1.617(3)   |
|           |           |           |            |           |            | Si62-O64     | 1.614(3)   |
| Si1-C1    | 1.849(2)  | Si1-C1    | 1.849(3)   | Si1-C7    | 1.865(2)   | Si1-C13      | 1.857(5)   |
| Si1-C7    | 1.856(2)  | Si1-C7    | 1.855(3)   | Si1-C13   | 1.877(2)   | Si1-C19      | 1.862(5)   |
|           |           |           |            |           |            | Si2-C25      | 1.878(4)   |
|           |           |           |            |           |            | Si2-C31      | 1.874(5)   |
|           |           |           |            |           |            | Si61-C73     | 1.864(5)   |
|           |           |           |            |           |            | Si61-C79     | 1.864(5)   |
|           |           |           |            |           |            | Si62-C85     | 1.877(5)   |
|           |           |           |            |           |            | Si62-C91     | 1.875(5)   |
| B1-O1     | 1.367(3)  | B1-O1     | 1.361(3)   | B1-O1     | 1.424(3)   | B1-O1        | 1.415(6)   |
| B1-O2     | 1.360(3)  | B1-O2     | 1.362(3)   | B1-O2     | 1.440(3)   | B1-O4        | 1.447(6)   |
|           |           |           |            |           |            | B2-O2        | 1.415(6)   |
|           |           |           |            |           |            | B2-O3        | 1.436(6)   |
|           |           |           |            |           |            | B61-O61      | 1.413(6)   |
|           |           |           |            |           |            | B61-O64      | 1.439(6)   |
|           |           |           |            |           |            | B62-O62      | 1.410(6)   |
|           |           |           |            |           |            | B62-O63      | 1.448(6)   |
| B1-C13    | 1.556(3)  | B1-C13    | 1.561(4)   | B1-C1     | 1.623(4)   | B1-C1        | 1.623(7)   |
|           |           |           |            |           |            | B2-C7        | 1.644(7)   |
|           |           |           |            |           |            | B61-C61      | 1.636(7)   |
|           |           |           |            |           |            | B62-C67      | 1.610(7)   |
|           |           |           |            | B1-N21    | 1.697(3)   | B1-N41       | 1.690(6)   |
|           |           |           |            |           |            | B2-N102      | 1.713(6)   |
|           |           |           |            |           |            | B61-N42      | 1.704(6)   |
|           |           |           |            |           |            | B62-N101     | 1.694(6)   |
| F1-C16    | 1.368(2)  | F1-C15    | 1.363(3)   | F1-C4     | 1.368(2)   | F1-C3        | 1.356(5)   |
|           |           | F2-C17    | 1.361(3)   |           |            | F2-C5        | 1.363(5)   |
|           |           |           |            |           |            | F3-C9        | 1.369(5)   |
|           |           |           |            |           |            | F4-C11       | 1.362(5)   |
|           |           |           |            |           |            | F61-C63      | 1.376(5)   |
|           |           |           |            |           |            | F62-C65      | 1.373(5)   |
|           |           |           |            |           |            | F63-C69      | 1.365(5)   |
|           |           |           |            |           |            | F64-C71      | 1.344(6)   |
| O1-Si1-O2 | 113.21(8) | O1-Si1-O2 | 112.03(10) | O1-Si1-O2 | 115.65(9)  | O1-Si1-O2    | 115.36(17) |
|           |           |           |            |           |            | O3-Si2-O4    | 115.01(17) |
|           |           |           |            |           |            | O61-Si61-O62 | 114.37(17) |

**Electronic Supplementary Information (ESI)**

**Table S4** Selected bond angles (°) for compounds 2-5

| 2         |            | 3         |            | 4          |            | 5            |            |
|-----------|------------|-----------|------------|------------|------------|--------------|------------|
|           |            |           |            |            |            | O63–Si62–O64 | 114.37(17) |
| O1–Si1–C1 | 107.54(9)  | O1–Si1–C1 | 108.11(12) | O1–Si1–C7  | 108.78(10) | O1–Si1–C13   | 107.3(2)   |
| O1–Si1–C7 | 108.89(10) | O1–Si1–C7 | 106.78(11) | O1–Si1–C13 | 104.62(9)  | O1–Si1–C19   | 105.87(19) |
| O2–Si1–C1 | 108.57(9)  | O2–Si1–C1 | 107.49(12) | O2–Si1–C7  | 108.11(10) | O2–Si1–C13   | 109.07(19) |
| O2–Si1–C7 | 107.58(10) | O2–Si1–C7 | 107.24(12) | O2–Si1–C13 | 107.18(10) | O2–Si1–C19   | 106.97(19) |
|           |            |           |            |            |            | O3–Si2–C25   | 103.30(18) |
|           |            |           |            |            |            | O3–Si2–C31   | 108.59(18) |
|           |            |           |            |            |            | O4–Si2–C25   | 109.0(2)   |
|           |            |           |            |            |            | O4–Si2–C31   | 108.59(18) |
|           |            |           |            |            |            | O61–Si61–C73 | 107.04(19) |
|           |            |           |            |            |            | O61–Si61–C79 | 107.88(19) |
|           |            |           |            |            |            | O62–Si61–C73 | 105.44(18) |
|           |            |           |            |            |            | O62–Si61–C79 | 109.18(19) |
|           |            |           |            |            |            | O63–Si62–C85 | 107.99(18) |
|           |            |           |            |            |            | O63–Si62–C91 | 107.5(2)   |
|           |            |           |            |            |            | O64–Si62–C85 | 107.7(2)   |
|           |            |           |            |            |            | O64–Si62–C91 | 104.71(18) |
| C1–Si1–C7 | 111.0(10)  | C1–Si1–C7 | 115.28(12) | C7–Si1–C13 | 112.58(10) | C13–Si1–C19  | 112.3(2)   |
|           |            |           |            |            |            | C25–Si2–C31  | 112.68(19) |
|           |            |           |            |            |            | C73–Si61–C79 | 107.88(19) |
|           |            |           |            |            |            | C85–Si62–C91 | 113.0(2)   |
| O1–B1–O2  | 121.70(2)  | O1–B1–O2  | 121.30(3)  | O1–B1–O2   | 117.6(2)   | O1–B1–O4     | 116.8(4)   |
|           |            |           |            |            |            | O2–B2–O3     | 118.7(4)   |
|           |            |           |            |            |            | O61–B61–O64  | 118.6(4)   |
|           |            |           |            |            |            | O62–B62–O63  | 117.1(4)   |
| O1–B1–C13 | 119.10(2)  | O1–B1–C13 | 118.90(3)  | O1–B1–C1   | 112.70(19) | O1–B1–C1     | 113.9(4)   |
| O2–B1–C13 | 119.20(2)  | O2–B1–C13 | 119.70(19) | O2–B1–C1   | 110.9(2)   | O4–B1–C1     | 110.5(4)   |
|           |            |           |            |            |            | O2–B2–C7     | 111.7(4)   |
|           |            |           |            |            |            | O3–B2–C7     | 112.1(4)   |
|           |            |           |            |            |            | O61–B61–C61  | 111.4(4)   |
|           |            |           |            |            |            | O64–B61–C61  | 111.6(4)   |
|           |            |           |            |            |            | O62–B62–C67  | 113.3(4)   |
|           |            |           |            |            |            | O63–B62–C67  | 110.0(4)   |
|           |            |           |            | O1–B1–N21  | 102.36(19) | O1–B1–N41    | 102.6(4)   |
|           |            |           |            | O2–B1–N21  | 104.83(17) | O4–B1–N41    | 104.8(4)   |
|           |            |           |            |            |            | O2–B2–N102   | 106.8(4)   |
|           |            |           |            |            |            | O3–B2–N102   | 100.9(3)   |
|           |            |           |            |            |            | O61–B61–N42  | 106.6(4)   |
|           |            |           |            |            |            | O64–B61–N42  | 101.3(4)   |
|           |            |           |            |            |            | O62–B62–N101 | 102.9(3)   |
|           |            |           |            |            |            | O63–B62–N101 | 104.8(4)   |
| B1–O1–Si1 | 143.08(16) | B1–O1–Si1 | 138.43(19) | B1–O1–Si1  | 142.59(15) | B1–O1–Si1    | 145.2(3)   |
| B1–O2–Si1 | 151.03(16) | B1–O2–Si1 | 154.50(2)  | B1–O2–Si1  | 141.45(16) | B2–O2–Si1    | 142.8(3)   |
|           |            |           |            |            |            | B2–O3–Si2    | 140.1(3)   |
|           |            |           |            |            |            | B1–O4–Si2    | 141.4(3)   |
|           |            |           |            |            |            | B61–O61–Si61 | 141.8(3)   |
|           |            |           |            |            |            | B62–O62–Si61 | 141.2(3)   |
|           |            |           |            |            |            | B62–O63–Si62 | 141.8(3)   |
|           |            |           |            |            |            | B61–O64–Si62 | 139.6(3)   |



**Electronic Supplementary Information (ESI)**

**Table S5. Optimised geometry calculated for the antiperiplanar conformation of 1 at DFT level in the gas phase (total charge = 0, spin multiplicity = 1) in orthogonal Cartesian coordinate format.**

| Atom number | Z  | X         | Y         | Z         |
|-------------|----|-----------|-----------|-----------|
| 1           | 6  | -1.247285 | 0.899615  | 0.000117  |
| 2           | 16 | 0.009916  | -0.298037 | 0.000057  |
| 3           | 6  | 1.250487  | 0.916839  | 0.000123  |
| 4           | 6  | 0.695833  | 2.188207  | 0.000177  |
| 5           | 6  | -0.710506 | 2.178594  | 0.000163  |
| 6           | 6  | 2.609270  | 0.554879  | 0.000088  |
| 7           | 6  | 3.784379  | 0.227938  | 0.000043  |
| 8           | 6  | 5.151256  | -0.157869 | -0.000017 |
| 9           | 6  | 5.517310  | -1.520372 | -0.000144 |
| 10          | 7  | 6.771856  | -1.942566 | -0.000207 |
| 11          | 6  | 7.744324  | -1.033369 | -0.000153 |
| 12          | 6  | 7.504217  | 0.340946  | -0.000034 |
| 13          | 6  | 6.190322  | 0.788243  | 0.000039  |
| 14          | 6  | -2.601094 | 0.519513  | 0.000080  |
| 15          | 6  | -3.771459 | 0.176047  | 0.000041  |
| 16          | 6  | -5.138147 | -0.210412 | -0.000006 |
| 17          | 6  | -5.527304 | -1.560756 | 0.000357  |
| 18          | 6  | -6.880797 | -1.868133 | 0.000282  |
| 19          | 6  | -7.805397 | -0.823396 | -0.000140 |
| 20          | 7  | -7.453562 | 0.460599  | -0.000493 |
| 21          | 6  | -6.163782 | 0.758207  | -0.000434 |
| 22          | 1  | 4.734058  | -2.284683 | -0.000196 |
| 23          | 1  | 5.955920  | 1.853445  | 0.000143  |
| 24          | 1  | 8.335986  | 1.046499  | 0.000003  |
| 25          | 1  | 8.770242  | -1.415123 | -0.000210 |
| 26          | 1  | -8.879232 | -1.035802 | -0.000202 |
| 27          | 1  | -7.219475 | -2.904915 | 0.000548  |
| 28          | 1  | -4.769549 | -2.345259 | 0.000696  |
| 29          | 1  | -5.897007 | 1.819565  | -0.000732 |
| 30          | 1  | 1.306596  | 3.089337  | 0.000243  |
| 31          | 1  | -1.334012 | 3.070958  | 0.000198  |

**Electronic Supplementary Information (ESI)**

**Table S6. Optimised geometry calculated for the periplanar conformation of 1 at DFT level in the gas phase (total charge = 0, spin multiplicity = 1) in orthogonal Cartesian coordinate format.**

| Atom number | Z  | X         | Y        | Z         |
|-------------|----|-----------|----------|-----------|
| 1           | 6  | -1.249048 | 0.000000 | -0.880380 |
| 2           | 16 | 0.000000  | 0.000000 | 0.325963  |
| 3           | 6  | 1.249048  | 0.000000 | -0.880380 |
| 4           | 6  | 0.703215  | 0.000000 | -2.155481 |
| 5           | 6  | -0.703215 | 0.000000 | -2.155481 |
| 6           | 6  | 2.605390  | 0.000000 | -0.509480 |
| 7           | 6  | 3.778105  | 0.000000 | -0.174075 |
| 8           | 6  | 5.147460  | 0.000000 | 0.202822  |
| 9           | 6  | 6.166343  | 0.000000 | -0.772945 |
| 10          | 7  | 7.458151  | 0.000000 | -0.484295 |
| 11          | 6  | 7.818995  | 0.000000 | 0.797186  |
| 12          | 6  | 6.901718  | 0.000000 | 1.848349  |
| 13          | 6  | 5.546119  | 0.000000 | 1.550387  |
| 14          | 6  | -2.605390 | 0.000000 | -0.509480 |
| 15          | 6  | -3.778105 | 0.000000 | -0.174075 |
| 16          | 6  | -5.147460 | 0.000000 | 0.202822  |
| 17          | 6  | -5.546119 | 0.000000 | 1.550387  |
| 18          | 6  | -6.901718 | 0.000000 | 1.848349  |
| 19          | 6  | -7.818995 | 0.000000 | 0.797186  |
| 20          | 7  | -7.458151 | 0.000000 | -0.484295 |
| 21          | 6  | -6.166343 | 0.000000 | -0.772945 |
| 22          | 1  | 5.892190  | 0.000000 | -1.832408 |
| 23          | 1  | 4.793876  | 0.000000 | 2.340166  |
| 24          | 1  | 7.247643  | 0.000000 | 2.882739  |
| 25          | 1  | 8.894295  | 0.000000 | 1.002058  |
| 26          | 1  | -8.894295 | 0.000000 | 1.002058  |
| 27          | 1  | -7.247643 | 0.000000 | 2.882739  |
| 28          | 1  | -4.793876 | 0.000000 | 2.340166  |
| 29          | 1  | -5.892190 | 0.000000 | -1.832408 |
| 30          | 1  | 1.320399  | 0.000000 | -3.052227 |
| 31          | 1  | -1.320399 | 0.000000 | -3.052227 |

**Electronic Supplementary Information (ESI)**

**Table S7. Optimised geometry calculated for 2 at DFT level in the gas phase (total charge = 0, spin multiplicity = 1) in orthogonal Cartesian coordinate format.**

| Atom number | Z  | X         | Y         | Z         |
|-------------|----|-----------|-----------|-----------|
| 1           | 6  | 4.404310  | -1.744994 | -0.555328 |
| 2           | 6  | 3.484137  | -0.763448 | -0.957028 |
| 3           | 6  | 3.691112  | -0.120821 | -2.187206 |
| 4           | 6  | 4.776389  | -0.455374 | -2.995304 |
| 5           | 6  | 5.675899  | -1.437490 | -2.583486 |
| 6           | 6  | 5.489905  | -2.082188 | -1.361098 |
| 7           | 14 | 2.014057  | -0.354027 | 0.115257  |
| 8           | 6  | 2.433864  | -0.267882 | 1.932144  |
| 9           | 6  | 3.443954  | 0.601062  | 2.378110  |
| 10          | 6  | 3.763214  | 0.694309  | 3.730489  |
| 11          | 6  | 3.078329  | -0.085414 | 4.662740  |
| 12          | 6  | 2.076375  | -0.955971 | 4.238574  |
| 13          | 6  | 1.758052  | -1.045637 | 2.884015  |
| 14          | 8  | 1.465074  | 1.122049  | -0.421085 |
| 15          | 5  | 0.389143  | 1.961758  | -0.399651 |
| 16          | 6  | 0.598849  | 3.470372  | -0.766113 |
| 17          | 6  | -0.484907 | 4.361785  | -0.819289 |
| 18          | 6  | -0.310590 | 5.703184  | -1.144729 |
| 19          | 6  | 0.973483  | 6.159257  | -1.420410 |
| 20          | 6  | 2.076375  | 5.313609  | -1.380304 |
| 21          | 6  | 1.877124  | 3.975959  | -1.053745 |
| 22          | 9  | 1.152258  | 7.442189  | -1.732252 |
| 23          | 8  | -0.856029 | 1.524970  | -0.064197 |
| 24          | 14 | -2.014057 | 0.354027  | 0.115257  |
| 25          | 8  | -1.465074 | -1.122049 | -0.421085 |
| 26          | 5  | -0.389143 | -1.961758 | -0.399651 |
| 27          | 6  | -0.598849 | -3.470372 | -0.766113 |
| 28          | 6  | 0.484907  | -4.361785 | -0.819289 |
| 29          | 6  | 0.310590  | -5.703184 | -1.144729 |
| 30          | 6  | -0.973483 | -6.159257 | -1.420410 |
| 31          | 6  | -2.076375 | -5.313609 | -1.380304 |
| 32          | 6  | -1.877124 | -3.975959 | -1.053745 |
| 33          | 9  | -1.152258 | -7.442189 | -1.732252 |
| 34          | 6  | -2.433864 | 0.267882  | 1.932144  |
| 35          | 6  | -3.443954 | -0.601062 | 2.378110  |
| 36          | 6  | -3.763214 | -0.694309 | 3.730489  |
| 37          | 6  | -3.078329 | 0.085414  | 4.662740  |
| 38          | 6  | -2.076375 | 0.955971  | 4.238574  |
| 39          | 6  | -1.758052 | 1.045637  | 2.884015  |
| 40          | 6  | -3.484137 | 0.763448  | -0.957028 |
| 41          | 6  | -3.691112 | 0.120821  | -2.187206 |
| 42          | 6  | -4.776389 | 0.455374  | -2.995304 |
| 43          | 6  | -5.675899 | 1.437490  | -2.583486 |
| 44          | 6  | -5.489905 | 2.082188  | -1.361098 |
| 45          | 6  | -4.404310 | 1.744994  | -0.555328 |
| 46          | 8  | 0.856029  | -1.524970 | -0.064197 |
| 47          | 1  | -1.488511 | 3.990515  | -0.603667 |
| 48          | 1  | -1.146893 | 6.401411  | -1.190303 |
| 49          | 1  | 3.065429  | 5.714422  | -1.604310 |
| 50          | 1  | 2.734104  | 3.300513  | -1.019703 |

**Electronic Supplementary Information (ESI)**

|    |   |   |           |           |           |
|----|---|---|-----------|-----------|-----------|
| 51 | 1 |   | -3.992860 | -1.215132 | 1.659436  |
| 52 | 1 |   | -4.549894 | -1.375873 | 4.059477  |
| 53 | 1 |   | -3.328734 | 0.014595  | 5.723058  |
| 54 | 1 |   | -1.538399 | 1.568024  | 4.964786  |
| 55 | 1 |   | -0.972340 | 1.732068  | 2.562782  |
| 56 | 1 |   | -2.994565 | -0.654188 | -2.513912 |
| 57 | 1 |   | -4.922178 | -0.053992 | -3.949785 |
| 58 | 1 |   | -6.527020 | 1.698984  | -3.215239 |
| 59 | 1 | Z | -6.196017 | 2.847368  | -1.033093 |
| 60 | 1 | 6 | -4.277182 | 2.250893  | 0.405476  |
| 61 | 1 |   | 1.488511  | -3.990515 | -0.603667 |
| 62 | 1 |   | 1.146893  | -6.401411 | -1.190303 |
| 63 | 1 |   | -3.065429 | -5.714422 | -1.604310 |
| 64 | 1 |   | -2.734104 | -3.300513 | -1.019703 |
| 65 | 1 |   | 3.992860  | 1.215132  | 1.659436  |
| 66 | 1 |   | 4.549894  | 1.375873  | 4.059477  |
| 67 | 1 |   | 3.328734  | -0.014595 | 5.723058  |
| 68 | 1 |   | 1.538399  | -1.568024 | 4.964786  |
| 69 | 1 |   | 0.972340  | -1.732068 | 2.562782  |
| 70 | 1 |   | 2.994565  | 0.654188  | -2.513912 |
| 71 | 1 |   | 4.922178  | 0.053992  | -3.949785 |
| 72 | 1 |   | 6.527020  | -1.698984 | -3.215239 |
| 73 | 1 |   | 6.196017  | -2.847368 | -1.033093 |
| 74 | 1 |   | 4.277182  | -2.250893 | 0.405476  |

**Table S8. Optimised geometry calculated for 3 at DFT level in the gas phase (total charge = 0, spin multiplicity = 1) in orthogonal Cartesian coordinate format.**

**Electronic Supplementary Information (ESI)**

|    |    |           |           |           |
|----|----|-----------|-----------|-----------|
| 2  | 6  | 2.645691  | 2.368018  | -0.963164 |
| 3  | 6  | 2.932341  | 3.696288  | -0.608737 |
| 4  | 6  | 3.694333  | 4.511332  | -1.442941 |
| 5  | 6  | 4.188060  | 4.007546  | -2.645871 |
| 6  | 6  | 3.919632  | 2.689175  | -3.010376 |
| 7  | 14 | 1.590200  | 1.309116  | 0.148272  |
| 8  | 6  | 2.023213  | 1.469365  | 1.955552  |
| 9  | 6  | 1.056488  | 1.776380  | 2.924637  |
| 10 | 6  | 1.399967  | 1.873218  | 4.272429  |
| 11 | 6  | 2.718604  | 1.665069  | 4.672129  |
| 12 | 6  | 3.694333  | 1.362182  | 3.722345  |
| 13 | 6  | 3.348486  | 1.267781  | 2.376617  |
| 14 | 8  | -0.000574 | 1.750474  | -0.014256 |
| 15 | 5  | -1.299896 | 1.514026  | -0.330624 |
| 16 | 6  | -2.236835 | 2.733716  | -0.667689 |
| 17 | 6  | -3.598170 | 2.530738  | -0.935152 |
| 18 | 6  | -4.409094 | 3.618062  | -1.228573 |
| 19 | 6  | -3.915245 | 4.916717  | -1.267989 |
| 20 | 6  | -2.563362 | 5.099228  | -1.001257 |
| 21 | 6  | -1.721478 | 4.036891  | -0.703216 |
| 22 | 9  | -5.702527 | 3.421661  | -1.481416 |
| 23 | 9  | -2.070446 | 6.336469  | -1.034822 |
| 24 | 8  | 1.826417  | -0.258973 | -0.361789 |
| 25 | 5  | 1.299896  | -1.514026 | -0.330624 |
| 26 | 6  | 2.236835  | -2.733716 | -0.667689 |
| 27 | 6  | 1.721478  | -4.036891 | -0.703216 |
| 28 | 6  | 2.563362  | -5.099228 | -1.001257 |
| 29 | 6  | 3.915245  | -4.916717 | -1.267989 |
| 30 | 6  | 4.409094  | -3.618062 | -1.228573 |
| 31 | 6  | 3.598170  | -2.530738 | -0.935152 |
| 32 | 9  | 2.070446  | -6.336469 | -1.034822 |
| 33 | 9  | 5.702527  | -3.421661 | -1.481416 |
| 34 | 8  | 0.000574  | -1.750474 | -0.014256 |
| 35 | 14 | -1.590200 | -1.309116 | 0.148272  |
| 36 | 6  | -2.023213 | -1.469365 | 1.955552  |
| 37 | 6  | -1.056488 | -1.776380 | 2.924637  |
| 38 | 6  | -1.399967 | -1.873218 | 4.272429  |
| 39 | 6  | -2.718604 | -1.665069 | 4.672129  |
| 40 | 6  | -3.694333 | -1.362182 | 3.722345  |
| 41 | 6  | -3.348486 | -1.267781 | 2.376617  |
| 42 | 8  | -1.826417 | 0.258973  | -0.361789 |
| 43 | 6  | -2.645691 | -2.368018 | -0.963164 |
| 44 | 6  | -2.932341 | -3.696288 | -0.608737 |
| 45 | 6  | -3.694333 | -4.511332 | -1.442941 |
| 46 | 6  | -4.188060 | -4.007546 | -2.645871 |
| 47 | 6  | -3.919632 | -2.689175 | -3.010376 |
| 48 | 6  | -3.155545 | -1.876551 | -2.174595 |
| 49 | 1  | 0.667181  | -4.229175 | -0.504824 |
| 50 | 1  | 4.563731  | -5.760464 | -1.500003 |
| 51 | 1  | 4.030168  | -1.530218 | -0.916301 |
| 52 | 1  | -4.030168 | 1.530218  | -0.916301 |
| 53 | 1  | -4.563731 | 5.760464  | -1.500003 |
| 54 | 1  | -0.667181 | 4.229175  | -0.504824 |
| 55 | 1  | -2.561026 | -4.101661 | 0.336259  |
| 56 | 1  | -3.906999 | -5.541841 | -1.152686 |
| 57 | 1  | -4.787164 | -4.644263 | -3.299674 |



**Electronic Supplementary Information (ESI)**

|    |    |            |           |           |     |   |            |           |           |
|----|----|------------|-----------|-----------|-----|---|------------|-----------|-----------|
| 10 | 16 | -9.008717  | -0.997006 | 0.169688  | 78  | 6 | 1.105816   | -3.665367 | 0.500940  |
| 11 | 6  | -8.699394  | 0.625487  | 0.704238  | 79  | 6 | 1.455812   | -4.090123 | 1.781438  |
| 12 | 6  | -9.837227  | 1.188236  | 1.263530  | 80  | 6 | 1.117164   | -3.309117 | 2.886768  |
| 13 | 6  | -10.942119 | 0.318789  | 1.259362  | 81  | 6 | 0.433962   | -2.108091 | 2.705598  |
| 14 | 6  | -7.425960  | 1.199873  | 0.548381  | 82  | 6 | 1.308035   | 3.477698  | 1.533739  |
| 15 | 6  | -6.312747  | 1.676748  | 0.410176  | 83  | 6 | 2.324394   | 4.311945  | 1.041736  |
| 16 | 6  | -5.015406  | 2.231253  | 0.253482  | 84  | 6 | 2.376931   | 5.672209  | 1.338157  |
| 17 | 6  | -4.021224  | 1.524404  | -0.435864 | 85  | 6 | 1.389675   | 6.217149  | 2.149460  |
| 18 | 7  | -2.792120  | 2.010662  | -0.601845 | 86  | 6 | 0.361966   | 5.436742  | 2.661095  |
| 19 | 6  | -2.464437  | 3.207219  | -0.104239 | 87  | 6 | 0.334592   | 4.077123  | 2.345984  |
| 20 | 6  | -3.389171  | 3.978576  | 0.589523  | 88  | 9 | 1.428050   | 7.521350  | 2.441907  |
| 21 | 6  | -4.675217  | 3.493612  | 0.772546  | 89  | 1 | -2.241300  | 2.245544  | -3.808620 |
| 22 | 5  | -1.602033  | 1.029059  | -1.362814 | 90  | 1 | -3.335570  | 1.292345  | -5.841649 |
| 23 | 6  | -2.309558  | 0.408422  | -2.676128 | 91  | 1 | -3.601715  | -2.529285 | -3.922134 |
| 24 | 6  | -2.548156  | 1.196513  | -3.813020 | 92  | 1 | -2.508570  | -1.578593 | -1.875510 |
| 25 | 6  | -3.152478  | 0.680327  | -4.957327 | 93  | 1 | 2.566036   | -0.733839 | -1.107400 |
| 26 | 6  | -3.524776  | -0.658698 | -4.968239 | 94  | 1 | 3.413570   | -2.556494 | -2.554004 |
| 27 | 6  | -3.304827  | -1.480784 | -3.872119 | 95  | 1 | 3.021447   | -2.481066 | -5.012721 |
| 28 | 6  | -2.699315  | -0.936581 | -2.738523 | 96  | 1 | 1.784191   | -0.564184 | -6.007963 |
| 29 | 9  | -4.104633  | -1.165565 | -6.061736 | 97  | 1 | 0.963627   | 1.265963  | -4.569729 |
| 30 | 8  | -0.558915  | 1.971756  | -1.650869 | 98  | 1 | 3.786516   | 2.762621  | -2.461982 |
| 31 | 14 | 1.083397   | 1.821034  | -1.659898 | 99  | 1 | 4.674988   | 4.892002  | -3.343961 |
| 32 | 8  | 1.672504   | 1.534504  | -0.138000 | 100 | 1 | 3.140394   | 6.803537  | -3.778101 |
| 33 | 5  | 1.265643   | 1.891892  | 1.188393  | 101 | 1 | 0.705784   | 6.560473  | -3.327260 |
| 34 | 7  | 2.505698   | 1.209458  | 2.146898  | 102 | 1 | -0.185786  | 4.423754  | -2.437683 |
| 35 | 6  | 2.338831   | 1.162424  | 3.473620  | 103 | 1 | -4.217436  | 0.546354  | -0.874928 |
| 36 | 6  | 3.320870   | 0.646853  | 4.305908  | 104 | 1 | -5.423442  | 4.073725  | 1.313193  |
| 37 | 6  | 4.499958   | 0.167464  | 3.748026  | 105 | 1 | -3.088809  | 4.949381  | 0.982646  |
| 38 | 6  | 4.669721   | 0.214916  | 2.354782  | 106 | 1 | -1.435722  | 3.520468  | -0.278060 |
| 39 | 6  | 3.623141   | 0.756311  | 1.590092  | 107 | 1 | -9.851603  | 2.202448  | 1.658881  |
| 40 | 6  | 5.841127   | -0.264349 | 1.712796  | 108 | 1 | -11.926413 | 0.569348  | 1.650922  |
| 41 | 6  | 6.833414   | -0.674597 | 1.135369  | 109 | 1 | 5.289862   | -0.245357 | 4.376008  |
| 42 | 6  | 7.974904   | -1.147703 | 0.466037  | 110 | 1 | 1.390125   | 1.549348  | 3.844692  |
| 43 | 16 | 9.357876   | -1.715688 | 1.348169  | 111 | 1 | 3.158574   | 0.621175  | 5.383065  |
| 44 | 6  | 10.216188  | -2.074701 | -0.116729 | 112 | 1 | 3.665267   | 0.826679  | 0.503734  |
| 45 | 6  | 9.449139   | -1.762349 | -1.230146 | 113 | 1 | 0.152202   | -2.132402 | -0.679786 |
| 46 | 6  | 8.186066   | -1.239894 | -0.902053 | 114 | 1 | 1.361982   | -4.275919 | -0.367430 |
| 47 | 6  | 11.515958  | -2.609415 | -0.072821 | 115 | 1 | 1.987172   | -5.033943 | 1.920327  |
| 48 | 6  | 12.643204  | -3.072270 | -0.023017 | 116 | 1 | 1.379760   | -3.643036 | 3.892879  |
| 49 | 6  | 13.956038  | -3.610679 | 0.039459  | 117 | 1 | 0.159366   | -1.516828 | 3.583856  |
| 50 | 6  | 14.573420  | -3.865593 | 1.281973  | 118 | 1 | -3.256975  | -1.734368 | 1.344150  |
| 51 | 7  | 15.792848  | -4.365278 | 1.405238  | 119 | 1 | -5.302413  | -1.706469 | 2.729597  |
| 52 | 6  | 16.476363  | -4.643475 | 0.297213  | 120 | 1 | -5.595359  | 0.023088  | 4.494014  |
| 53 | 6  | 15.969530  | -4.433908 | -0.985683 | 121 | 1 | -3.820105  | 1.728903  | 4.860334  |
| 54 | 6  | 14.691347  | -3.910117 | -1.119992 | 122 | 1 | -1.772234  | 1.710204  | 3.456828  |
| 55 | 6  | 1.709484   | 0.406809  | -2.726590 | 123 | 1 | 3.094996   | 3.894002  | 0.390302  |
| 56 | 6  | 2.404414   | -0.684571 | -2.185604 | 124 | 1 | -0.395499  | 5.900109  | 3.295286  |
| 57 | 6  | 2.876789   | -1.715433 | -2.998340 | 125 | 1 | -0.476596  | 3.457957  | 2.734687  |
| 58 | 6  | 2.656493   | -1.674139 | -4.373827 | 126 | 1 | 3.162851   | 6.317371  | 0.943812  |
| 59 | 6  | 1.964317   | -0.599332 | -4.931720 | 127 | 1 | 14.029557  | -3.644251 | 2.205482  |
| 60 | 6  | 1.500818   | 0.429805  | -4.115189 | 128 | 1 | 14.254809  | -3.729687 | -2.103072 |
| 61 | 6  | 1.732208   | 3.441648  | -2.361140 | 129 | 1 | 16.569683  | -4.678365 | -1.862948 |
| 62 | 6  | 3.100635   | 3.596589  | -2.635817 | 130 | 1 | 17.481336  | -5.055283 | 0.433669  |
| 63 | 6  | 3.607149   | 4.793834  | -3.137480 | 131 | 1 | 7.434818   | -0.935151 | -1.628937 |
| 64 | 6  | 2.747338   | 5.864571  | -3.382979 | 132 | 1 | 9.808707   | -1.914784 | -2.246183 |
| 65 | 6  | 1.383897   | 5.727696  | -3.129552 | 133 | 1 | -16.273545 | -5.243605 | 0.707183  |

**Electronic Supplementary Information (ESI)**

|    |    |           |           |           |     |   |            |           |           |
|----|----|-----------|-----------|-----------|-----|---|------------|-----------|-----------|
| 66 | 6  | 0.884742  | 4.526861  | -2.625532 | 134 | 1 | -11.578405 | -5.338516 | -0.714759 |
| 67 | 8  | -1.278678 | 0.027089  | -0.389364 | 135 | 1 | -14.868225 | -3.192090 | 1.071781  |
| 68 | 14 | -0.831302 | -0.031052 | 1.193227  | 136 | 1 | -15.223792 | -7.244344 | -0.361981 |

---



**Electronic Supplementary Information (ESI)**

**Table S10. Optimised geometry calculated for the periplanar geometry of 1<sub>2</sub>-2 at DFT level in the gas phase (total charge = 0, spin multiplicity = 1) in orthogonal Cartesian coordinate format.**

| Atom number | Z  | X          | Y         | Z         | Atom number | Z  | X         | Y         | Z         |
|-------------|----|------------|-----------|-----------|-------------|----|-----------|-----------|-----------|
| 1           | 6  | -16.090341 | -0.864056 | -1.215801 | 69          | 6  | 6.579555  | -0.875562 | 2.766975  |
| 2           | 6  | -16.202967 | -0.771409 | 0.171801  | 70          | 6  | 7.969484  | -0.673242 | 2.811041  |
| 3           | 6  | -15.056607 | -0.540932 | 0.919327  | 71          | 16 | 8.873453  | -0.426452 | 1.349162  |
| 4           | 6  | -13.826996 | -0.409629 | 0.251950  | 72          | 6  | 10.361334 | -0.266189 | 2.227708  |
| 5           | 6  | -13.837372 | -0.522046 | -1.154253 | 73          | 6  | 10.148554 | -0.402871 | 3.592082  |
| 6           | 7  | -14.933411 | -0.741996 | -1.862855 | 74          | 6  | 8.800941  | -0.631936 | 3.920542  |
| 7           | 6  | -12.614642 | -0.172989 | 0.953090  | 75          | 6  | 11.571474 | -0.031347 | 1.551211  |
| 8           | 6  | -11.571452 | 0.030363  | 1.551205  | 76          | 6  | 12.614647 | 0.172412  | 0.953205  |
| 9           | 6  | -10.361305 | 0.264711  | 2.227860  | 77          | 6  | 13.826985 | 0.409539  | 0.252202  |
| 10          | 6  | -10.148498 | 0.400320  | 3.592336  | 78          | 6  | 15.056606 | 0.540409  | 0.919646  |
| 11          | 6  | -8.800883  | 0.629156  | 3.920949  | 79          | 6  | 16.202951 | 0.771397  | 0.172255  |
| 12          | 6  | -7.969449  | 0.671367  | 2.811466  | 80          | 6  | 16.090301 | 0.864967  | -1.215283 |
| 13          | 16 | -8.873445  | 0.425713  | 1.349409  | 81          | 7  | 14.933360 | 0.743331  | -1.862399 |
| 14          | 6  | -6.579525  | 0.873746  | 2.767533  | 82          | 6  | 13.837336 | 0.522898  | -1.153926 |
| 15          | 6  | -5.373617  | 1.040724  | 2.705502  | 83          | 6  | 1.439786  | 1.920221  | -2.628660 |
| 16          | 6  | -3.969214  | 1.229518  | 2.631999  | 84          | 6  | 1.524018  | 1.028959  | -3.708664 |
| 17          | 6  | -3.325496  | 1.294745  | 1.388200  | 85          | 6  | 1.530892  | 1.493487  | -5.023974 |
| 18          | 7  | -2.010066  | 1.465812  | 1.280078  | 86          | 6  | 1.452701  | 2.860786  | -5.281347 |
| 19          | 6  | -1.249092  | 1.583889  | 2.370912  | 87          | 6  | 1.367982  | 3.762486  | -4.220320 |
| 20          | 6  | -1.802894  | 1.538227  | 3.645493  | 88          | 6  | 1.364425  | 3.294176  | -2.908667 |
| 21          | 6  | -3.171585  | 1.360018  | 3.783608  | 89          | 1  | 0.882119  | -4.279799 | 0.152536  |
| 22          | 5  | -1.324096  | 1.540010  | -0.310279 | 90          | 1  | 1.974801  | -6.277935 | -0.867384 |
| 23          | 6  | -2.022053  | 2.837309  | -0.979023 | 91          | 1  | 4.392462  | -3.723405 | -3.314381 |
| 24          | 6  | -1.662141  | 4.139014  | -0.597747 | 92          | 1  | 3.303372  | -1.711106 | -2.292969 |
| 25          | 6  | -2.257903  | 5.266978  | -1.157919 | 93          | 1  | -1.576535 | 0.046135  | -3.514143 |
| 26          | 6  | -3.238057  | 5.090317  | -2.127243 | 94          | 1  | -1.593703 | -0.778912 | -5.850899 |
| 27          | 6  | -3.626376  | 3.824271  | -2.541772 | 95          | 1  | -1.457017 | -3.222261 | -6.312437 |
| 28          | 6  | -3.013888  | 2.712803  | -1.961591 | 96          | 1  | -1.303994 | -4.831749 | -4.419874 |
| 29          | 9  | -3.816632  | 6.165397  | -2.672929 | 97          | 1  | -1.299915 | -4.013645 | -2.092353 |
| 30          | 8  | 0.073213   | 1.692391  | -0.027461 | 98          | 1  | -4.412984 | -1.146668 | -1.024517 |
| 31          | 14 | 1.448129   | 1.302823  | -0.859184 | 99          | 1  | -6.267720 | -2.187507 | 0.233289  |
| 32          | 6  | 2.844599   | 2.115981  | 0.112399  | 100         | 1  | -5.786737 | -3.782595 | 2.081067  |
| 33          | 6  | 4.184180   | 1.835032  | -0.205048 | 101         | 1  | -3.428461 | -4.327776 | 2.660432  |
| 34          | 6  | 5.234435   | 2.423403  | 0.496932  | 102         | 1  | -1.566136 | -3.273455 | 1.405853  |
| 35          | 6  | 4.965438   | 3.317216  | 1.533777  | 103         | 1  | 3.880132  | -1.213948 | 0.453198  |
| 36          | 6  | 3.644720   | 3.619409  | 1.858958  | 104         | 1  | 3.637001  | -1.323877 | 4.767993  |
| 37          | 6  | 2.598699   | 3.023108  | 1.153622  | 105         | 1  | 1.159441  | -1.647906 | 4.517601  |
| 38          | 8  | 1.722655   | -0.321401 | -0.934289 | 106         | 1  | 0.184572  | -1.714888 | 2.174622  |
| 39          | 5  | 1.324110   | -1.539771 | -0.311270 | 107         | 1  | 8.427352  | -0.766039 | 4.934242  |
| 40          | 6  | 2.022037   | -2.836651 | -0.980852 | 108         | 1  | 10.958049 | -0.336366 | 4.316762  |
| 41          | 6  | 1.661986   | -4.138593 | -0.600520 | 109         | 1  | -0.882384 | 4.279756  | 0.155511  |
| 42          | 6  | 2.257744   | -5.266213 | -1.161389 | 110         | 1  | -1.975068 | 6.278517  | -0.863182 |
| 43          | 6  | 3.238037   | -5.088955 | -2.130461 | 111         | 1  | -4.392243 | 3.725502  | -3.312242 |
| 44          | 6  | 3.626490   | -3.822650 | -2.544077 | 112         | 1  | -3.303157 | 1.712572  | -2.292052 |
| 45          | 6  | 3.013998   | -2.711541 | -1.963216 | 113         | 1  | 1.577588  | -0.043844 | -3.514095 |
| 46          | 9  | 3.816614   | -6.163700 | -2.676806 | 114         | 1  | 1.594765  | 0.782631  | -5.850349 |
| 47          | 8  | -0.073203  | -1.692290 | -0.028541 | 115         | 1  | 1.456945  | 3.226190  | -6.310426 |
| 48          | 14 | -1.448132  | -1.302246 | -0.860018 | 116         | 1  | 1.302790  | 4.834451  | -4.416909 |
| 49          | 8  | -1.722603  | 0.322035  | -0.934081 | 117         | 1  | 1.298703  | 4.014932  | -2.089889 |

**Electronic Supplementary Information (ESI)**

|    |   |           |           |           |     |   |            |           |           |
|----|---|-----------|-----------|-----------|-----|---|------------|-----------|-----------|
| 50 | 6 | -1.439840 | -1.918535 | -2.629878 | 118 | 1 | 4.412987   | 1.147312  | -1.023791 |
| 51 | 6 | -1.523447 | -1.026576 | -3.709354 | 119 | 1 | 6.267731   | 2.187387  | 0.234625  |
| 52 | 6 | -1.530321 | -1.490302 | -5.024946 | 120 | 1 | 5.786771   | 3.781306  | 2.083418  |
| 53 | 6 | -1.452765 | -2.857483 | -5.283136 | 121 | 1 | 3.428497   | 4.326132  | 2.663142  |
| 54 | 6 | -1.368679 | -3.759871 | -4.222643 | 122 | 1 | 1.566162   | 3.272617  | 1.407902  |
| 55 | 6 | -1.365116 | -3.292359 | -2.910707 | 123 | 1 | 15.097199  | 0.459863  | 2.006593  |
| 56 | 6 | -2.844589 | -2.116028 | 0.111068  | 124 | 1 | 17.174824  | 0.878264  | 0.655555  |
| 57 | 6 | -4.184173 | -1.834887 | -0.206194 | 125 | 1 | 16.977245  | 1.046626  | -1.830521 |
| 58 | 6 | -5.234422 | -2.423696 | 0.495429  | 126 | 1 | 12.897584  | 0.426055  | -1.706263 |
| 59 | 6 | -4.965411 | -3.318153 | 1.531714  | 127 | 1 | -1.159391  | 1.644790  | 4.518667  |
| 60 | 6 | -3.644690 | -3.620545 | 1.856696  | 128 | 1 | -3.636955  | 1.320657  | 4.768844  |
| 61 | 6 | -2.598675 | -3.023800 | 1.151727  | 129 | 1 | -0.184528  | 1.713381  | 2.175720  |
| 62 | 7 | 2.010095  | -1.466647 | 1.279133  | 130 | 1 | -3.880113  | 1.213730  | 0.453977  |
| 63 | 6 | 3.325524  | -1.295623 | 1.387368  | 131 | 1 | -10.957974 | 0.333227  | 4.316983  |
| 64 | 6 | 3.969245  | -1.231253 | 2.631210  | 132 | 1 | -8.427277  | 0.762461  | 4.934749  |
| 65 | 6 | 3.171628  | -1.362573 | 3.782731  | 133 | 1 | -17.174833 | -0.878578 | 0.655048  |
| 66 | 6 | 1.802939  | -1.540719 | 3.644500  | 134 | 1 | -15.097182 | -0.461120 | 2.006329  |
| 67 | 6 | 1.249134  | -1.585503 | 2.369890  | 135 | 1 | -16.977296 | -1.045302 | -1.831145 |
| 68 | 6 | 5.373647  | -1.042495 | 2.704838  | 136 | 1 | -12.897631 | -0.424834 | -1.706543 |

---

**Electronic Supplementary Information (ESI)**

**Table S11. Optimised geometry calculated for the antiperiplanar geometry of  $1_2 \cdot 3$  at DFT level in the gas phase (total charge = 0, spin multiplicity = 1) in orthogonal Cartesian coordinate format.**

| Atom number | Z  | X         | Y         | Z         | Atom number | Z  | X          | Y         | Z         |
|-------------|----|-----------|-----------|-----------|-------------|----|------------|-----------|-----------|
| 1           | 6  | 14.695711 | 4.487683  | 0.519257  | 69          | 6  | 0.527481   | -0.433773 | -3.998460 |
| 2           | 6  | 15.133384 | 3.728860  | -0.566712 | 70          | 7  | -2.353642  | -0.163418 | 1.493588  |
| 3           | 6  | 14.253540 | 2.825134  | -1.145688 | 71          | 6  | -3.531539  | 0.326743  | 1.108967  |
| 4           | 6  | 12.956707 | 2.708152  | -0.617399 | 72          | 6  | -4.717149  | -0.411091 | 1.220938  |
| 5           | 6  | 12.628199 | 3.528116  | 0.482572  | 73          | 6  | -4.627819  | -1.711909 | 1.749612  |
| 6           | 7  | 13.470919 | 4.388691  | 1.031279  | 74          | 6  | -3.391447  | -2.202586 | 2.141464  |
| 7           | 6  | 12.004651 | 1.804368  | -1.159728 | 75          | 6  | -2.268022  | -1.395813 | 2.004623  |
| 8           | 6  | 11.183881 | 1.029860  | -1.622038 | 76          | 6  | -5.953173  | 0.152643  | 0.809389  |
| 9           | 6  | 10.227512 | 0.141333  | -2.144770 | 77          | 6  | -7.009973  | 0.647483  | 0.457223  |
| 10          | 6  | 10.359682 | -0.737277 | -3.211091 | 78          | 6  | -8.230477  | 1.212220  | 0.048446  |
| 11          | 6  | 9.193065  | -1.479971 | -3.461058 | 79          | 16 | -9.698401  | 0.286334  | 0.091234  |
| 12          | 6  | 8.157786  | -1.176732 | -2.588450 | 80          | 6  | -10.625609 | 1.619371  | -0.521860 |
| 13          | 16 | 8.641116  | 0.041554  | -1.450129 | 81          | 6  | -9.816716  | 2.724609  | -0.743522 |
| 14          | 6  | 6.863282  | -1.722006 | -2.548967 | 82          | 6  | -8.467263  | 2.495368  | -0.422353 |
| 15          | 6  | 5.735697  | -2.183352 | -2.500913 | 83          | 6  | -12.010292 | 1.493071  | -0.731754 |
| 16          | 6  | 4.421452  | -2.715074 | -2.442940 | 84          | 6  | -13.210709 | 1.371950  | -0.910135 |
| 17          | 6  | 3.530601  | -2.290016 | -1.443241 | 85          | 6  | -14.608414 | 1.226421  | -1.116451 |
| 18          | 7  | 2.291541  | -2.762781 | -1.360066 | 86          | 6  | -15.401302 | 2.281024  | -1.600026 |
| 19          | 6  | 1.844906  | -3.668948 | -2.238322 | 87          | 6  | -16.761332 | 2.069373  | -1.778216 |
| 20          | 6  | 2.656746  | -4.144793 | -3.256302 | 88          | 6  | -17.290402 | 0.815708  | -1.470070 |
| 21          | 6  | 3.957589  | -3.668168 | -3.364597 | 89          | 7  | -16.553245 | -0.193462 | -1.011290 |
| 22          | 5  | 1.241879  | -2.244613 | -0.135026 | 90          | 6  | -15.255723 | 0.003922  | -0.839698 |
| 23          | 6  | 1.039656  | -3.544477 | 0.828346  | 91          | 1  | 2.268711   | -4.882917 | -3.957608 |
| 24          | 6  | -0.227318 | -4.123175 | 0.977185  | 92          | 1  | -1.079720  | -3.732702 | 0.421379  |
| 25          | 6  | -0.411734 | -5.187719 | 1.849960  | 93          | 1  | 0.475689   | -6.572902 | 3.261508  |
| 26          | 6  | 0.631503  | -5.737401 | 2.580910  | 94          | 1  | 3.109865   | -3.671085 | 1.504402  |
| 27          | 6  | 1.888098  | -5.164880 | 2.410769  | 95          | 1  | 3.799060   | -1.548929 | -0.690824 |
| 28          | 6  | 2.103516  | -4.088158 | 1.561987  | 96          | 1  | 4.619905   | -4.022814 | -4.154678 |
| 29          | 9  | -1.642168 | -5.697469 | 2.004446  | 97          | 1  | 0.814597   | -3.995221 | -2.098541 |
| 30          | 9  | 2.912584  | -5.672981 | 3.097343  | 98          | 1  | -1.093550  | 1.801021  | 3.813612  |
| 31          | 8  | 1.952346  | -1.156220 | 0.463214  | 99          | 1  | -2.049913  | 5.895605  | 2.907319  |
| 32          | 14 | 1.667793  | -0.191931 | 1.783824  | 100         | 1  | -1.466735  | 3.082780  | -0.302209 |
| 33          | 6  | 2.659791  | 1.373983  | 1.489300  | 101         | 1  | 4.329732   | -1.052443 | 2.782519  |
| 34          | 6  | 3.278182  | 1.642487  | 0.259369  | 102         | 1  | 5.113316   | -2.173421 | 4.838622  |
| 35          | 6  | 4.020420  | 2.807050  | 0.063638  | 103         | 1  | 3.496087   | -2.764559 | 6.635332  |
| 36          | 6  | 4.153981  | 3.730003  | 1.099279  | 104         | 1  | 1.085330   | -2.215093 | 6.358597  |
| 37          | 6  | 3.545266  | 3.482938  | 2.329604  | 105         | 1  | 0.295996   | -1.096305 | 4.290386  |
| 38          | 6  | 2.810378  | 2.314943  | 2.520840  | 106         | 1  | 3.167524   | 0.931462  | -0.561354 |
| 39          | 8  | 0.051302  | 0.074192  | 1.990955  | 107         | 1  | 4.494370   | 2.994909  | -0.902167 |
| 40          | 5  | -0.932018 | 0.744299  | 1.194457  | 108         | 1  | 4.732912   | 4.643522  | 0.948690  |
| 41          | 6  | -1.259312 | 2.253008  | 1.690948  | 109         | 1  | 3.645368   | 4.203307  | 3.143858  |
| 42          | 6  | -1.298235 | 2.561265  | 3.058367  | 110         | 1  | 2.346632   | 2.133553  | 3.493779  |
| 43          | 6  | -1.580632 | 3.855711  | 3.470676  | 111         | 1  | 0.887347   | 2.058166  | -1.717083 |
| 44          | 6  | -1.832964 | 4.883669  | 2.568810  | 112         | 1  | 2.209080   | 3.030382  | -3.577657 |
| 45          | 6  | -1.787350 | 4.563990  | 1.218422  | 113         | 1  | 2.463552   | 1.778855  | -5.714630 |
| 46          | 6  | -1.508641 | 3.278388  | 0.769982  | 114         | 1  | 1.373020   | -0.442186 | -5.984620 |
| 47          | 9  | -1.613261 | 4.136173  | 4.776444  | 115         | 1  | 0.040605   | -1.403096 | -4.138776 |
| 48          | 9  | -2.021435 | 5.531991  | 0.327395  | 116         | 1  | -2.843222  | 1.062667  | -2.584631 |
| 49          | 6  | 2.245880  | -1.009887 | 3.373144  | 117         | 1  | -5.119525  | 0.500363  | -3.362869 |
| 50          | 6  | 3.604233  | -1.314335 | 3.557815  | 118         | 1  | -5.939087  | -1.845836 | -3.244583 |
| 51          | 6  | 4.053089  | -1.942425 | 4.717303  | 119         | 1  | -4.456178  | -3.629707 | -2.341994 |

**Electronic Supplementary Information (ESI)**

|    |    |           |           |           |     |   |            |           |           |
|----|----|-----------|-----------|-----------|-----|---|------------|-----------|-----------|
| 52 | 6  | 3.147165  | -2.272419 | 5.725344  | 120 | 1 | -2.173077  | -3.063477 | -1.550771 |
| 53 | 6  | 1.796954  | -1.966203 | 5.568619  | 121 | 1 | -3.526796  | 1.339189  | 0.705532  |
| 54 | 6  | 1.354196  | -1.340228 | 4.403466  | 122 | 1 | -5.528468  | -2.319040 | 1.843734  |
| 55 | 8  | 0.026419  | -1.910644 | -0.819588 | 123 | 1 | -3.281201  | -3.211119 | 2.539645  |
| 56 | 14 | -0.622393 | -0.494308 | -1.378631 | 124 | 1 | -1.265828  | -1.714274 | 2.288038  |
| 57 | 6  | -2.338754 | -0.960827 | -1.997996 | 125 | 1 | -18.359431 | 0.619927  | -1.600637 |
| 58 | 6  | -3.190134 | 0.027767  | -2.520100 | 126 | 1 | -17.407719 | 2.864632  | -2.151470 |
| 59 | 6  | -4.473698 | -0.284060 | -2.963315 | 127 | 1 | -14.944653 | 3.244968  | -1.827766 |
| 60 | 6  | -4.933465 | -1.599750 | -2.897848 | 128 | 1 | -14.668892 | -0.838873 | -0.461579 |
| 61 | 6  | -4.103105 | -2.597371 | -2.390965 | 129 | 1 | -7.673934  | 3.234107  | -0.523113 |
| 62 | 6  | -2.819468 | -2.277447 | -1.946414 | 130 | 1 | -10.208312 | 3.664928  | -1.127415 |
| 63 | 8  | -0.741801 | 0.672857  | -0.223537 | 131 | 1 | 16.147763  | 3.847000  | -0.949584 |
| 64 | 6  | 0.380553  | 0.251197  | -2.781100 | 132 | 1 | 14.552257  | 2.211121  | -1.996186 |
| 65 | 6  | 0.995674  | 1.505411  | -2.652276 | 133 | 1 | 15.367572  | 5.208388  | 0.996109  |
| 66 | 6  | 1.740227  | 2.051612  | -3.698212 | 134 | 1 | 11.626912  | 3.462992  | 0.919351  |
| 67 | 6  | 1.882614  | 1.351321  | -4.894804 | 135 | 1 | 11.282431  | -0.825763 | -3.781636 |
| 68 | 6  | 1.273016  | 0.105431  | -5.045029 | 136 | 1 | 9.091091   | -2.221396 | -4.251674 |

---

**Electronic Supplementary Information (ESI)**

**Table S12. Optimised geometry calculated for the periplanar geometry of  $1_2 \cdot 3$  at DFT level in the gas phase (total charge = 0, spin multiplicity = 1) in orthogonal Cartesian coordinate format.**

| Atom number | Z  | X          | Y         | Z         | Atom number | Z  | X         | Y             | Z                      |
|-------------|----|------------|-----------|-----------|-------------|----|-----------|---------------|------------------------|
| 1           | 6  | -7.801876  | 4.273439  | -0.000535 | 69          | 6  | -1.689586 | -5.602043     | 2.048928               |
| 2           | 16 | -6.247935  | 4.501739  | -0.738414 | 70          | 7  | 0.841582  | -0.550690     | 1.961988               |
| 3           | 6  | -5.832943  | 2.831039  | -0.512857 | 71          | 6  | -0.156016 | 0.228917      | 2.392637               |
| 4           | 6  | -6.864186  | 2.141008  | 0.107488  | 72          | 6  | -0.001120 | 1.603887      | 2.508394               |
| 5           | 6  | -7.973702  | 2.954596  | 0.395895  | 73          | 6  | 1.212621  | 2.180132      | 2.159523               |
| 6           | 6  | -4.589135  | 2.329857  | -0.932160 | 74          | 6  | 2.254905  | 1.360145      | 1.692307               |
| 7           | 6  | -3.510607  | 1.889335  | -1.291236 | 75          | 6  | 2.012160  | -0.021011     | 1.617468               |
| 8           | 6  | -2.255564  | 1.361483  | -1.690421 | 76          | 6  | 3.509156  | 1.889432      | 1.292514               |
| 9           | 6  | -2.011338  | -0.019438 | -1.615989 | 77          | 6  | 4.587038  | 2.331089      | 0.932895               |
| 10          | 7  | -0.839959  | -0.547674 | -1.960007 | 78          | 6  | 5.830141  | 2.833544      | 0.513018               |
| 11          | 6  | 0.157071   | 0.233217  | -2.389678 | 79          | 16 | 6.243942  | 4.504423      | 0.739408               |
| 12          | 6  | 0.000727   | 1.608055  | -2.504957 | 80          | 6  | 7.797579  | 4.277848      | 0.000353               |
| 13          | 6  | -1.213883  | 2.182806  | -2.156642 | 81          | 6  | 7.970109  | 2.959445      | -0.397240              |
| 14          | 5  | -0.624360  | -2.269678 | -1.934924 | 82          | 6  | 6.861424  | 2.144779      | -0.108660              |
| 15          | 6  | -1.054788  | -2.716040 | -3.437352 | 83          | 6  | 8.692050  | 5.354873      | -0.130533              |
| 16          | 6  | -0.111977  | -2.764536 | -4.472721 | 84          | 6  | 9.459324  | 6.296625      | -0.239231              |
| 17          | 6  | -0.502082  | -3.119213 | -5.757525 | 85          | 6  | 10.348875 | 7.396867      | -0.363772              |
| 18          | 6  | -1.817635  | -3.436195 | -6.071763 | 86          | 6  | 9.981393  | 8.677673      | 0.099275               |
| 19          | 6  | -2.741638  | -3.387007 | -5.035246 | 87          | 7  | 10.764685 | 9.740896      | 0.011312               |
| 20          | 6  | -2.384754  | -3.035803 | -3.739875 | 88          | 6  | 11.965913 | 9.596163      | -0.544036              |
| 21          | 9  | 0.412961   | -3.162068 | -6.729720 | 89          | 6  | 12.437908 | 8.379211      | -1.036976              |
| 22          | 9  | -4.014024  | -3.691084 | -5.302964 | 90          | 6  | 11.620115 | 7.261524      | -0.947140              |
| 23          | 6  | -8.697214  | 5.349719  | 0.130559  | 91          | 1  | 8.998586  | 8.819119      | 0.559427               |
| 24          | 6  | -9.465256  | 6.290819  | 0.239473  | 92          | 1  | 11.947758 | 6.290044      | -1.319211              |
| 25          | 6  | -10.355847 | 7.390195  | 0.364304  | 93          | 1  | 13.430828 | 8.312341      | -1.483229              |
| 26          | 6  | -11.626814 | 7.253584  | 0.947962  | 94          | 1  | 12.588897 | 10.49434<br>2 | -0.601471              |
| 27          | 6  | -12.445662 | 8.370479  | 1.038067  | 95          | 1  | -1.086606 | -0.287131     | 2.625370               |
| 28          | 6  | -11.974954 | 9.587918  | 0.545107  | 96          | 1  | -0.831722 | 2.212906      | 2.864335               |
| 29          | 7  | -10.773987 | 9.733848  | -0.010498 | 97          | 1  | 1.365755  | 3.256945      | 2.237024               |
| 30          | 6  | -9.989694  | 8.671389  | -0.098726 | 98          | 1  | 2.769081  | -0.719383     | 1.259532               |
| 31          | 8  | 0.774338   | -2.402843 | -1.687901 | 99          | 1  | 3.158261  | -3.029627     | 2.967085               |
| 32          | 14 | 1.805115   | -3.130239 | -0.626637 | 100         | 1  | 2.116770  | -3.720347     | 7.082693               |
| 33          | 6  | 1.759233   | -4.993789 | -0.788540 | 101         | 1  | -0.935542 | -2.551792     | 4.288177               |
| 34          | 6  | 1.860457   | -5.823590 | 0.337989  | 102         | 1  | 0.939808  | -2.544171     | -4.286985              |
| 35          | 6  | 1.899438   | -7.210503 | 0.205016  | 103         | 1  | -2.110229 | -3.716151     | -7.082500              |
| 36          | 6  | 1.836655   | -7.792049 | -1.059923 | 104         | 1  | -3.153262 | -3.030005     | -2.966514              |
| 37          | 6  | 1.728370   | -6.983558 | -2.191011 | 105         | 1  | 4.420464  | -3.090240     | 0.802254               |
| 38          | 6  | 1.690352   | -5.597674 | -2.054221 | 106         | 1  | 6.695093  | -2.342037     | 0.206270               |
| 39          | 8  | 1.540178   | -2.721432 | 0.945731  | 107         | 1  | 7.134955  | -1.325719     | -2.026713              |
| 40          | 5  | 0.627918   | -2.273112 | 1.936227  | 108         | 1  | 5.264434  | -1.046490     | -3.644790              |
| 41          | 6  | 1.059274   | -2.719604 | 3.438326  | 109         | 1  | 2.983281  | -1.797216     | -3.046359              |
| 42          | 6  | 2.389827   | -3.037257 | 3.740510  | 110         | 1  | 1.898883  | -5.378201     | 1.334322               |
| 43          | 6  | 2.747428   | -3.388703 | 5.035612  | 111         | 1  | 1.971852  | -7.839884     | 1.093860               |
| 44          | 6  | 1.823598   | -3.440199 | 6.072175  | 112         | 1  | 1.866872  | -8.878541     | -1.164968              |
| 45          | 6  | 0.507468   | -3.125305 | 5.758261  | 113         | 1  | 1.671662  | -7.434971     | -3.183629              |
| 46          | 6  | 0.116632   | -2.770441 | 4.473729  | 114         | 1  | 1.598908  | -4.978219     | -2.949632              |
| 47          | 9  | 4.020367   | -3.690763 | 5.303027  | 115         | 1  | -1.899240 | -5.375515     | -1.339089              |
| 48          | 9  | -0.407416  | -3.170410 | 6.730510  | 116         | 1  | -1.975216 | -7.837547     | -1.103542 <sub>1</sub> |
| 49          | 6  | 3.520971   | -2.487134 | -1.072415 | 117         | 1  | -1.870527 | -8.880897     | 1.153144               |
| 50          | 6  | 4.591204   | -2.630116 | -0.174121 | 118         | 1  | -1.672642 | -7.441641     | 3.174621               |

**Electronic Supplementary Information (ESI)**

|    |    |           |           |           |     |   |            |           |           |
|----|----|-----------|-----------|-----------|-----|---|------------|-----------|-----------|
| 51 | 6  | 5.878631  | -2.211233 | -0.506991 | 119 | 1 | -1.596988  | -4.984489 | 2.945535  |
| 52 | 6  | 6.124599  | -1.639733 | -1.755660 | 120 | 1 | -4.417327  | -3.086992 | -0.802298 |
| 53 | 6  | 5.077419  | -1.486950 | -2.663287 | 121 | 1 | -6.691462  | -2.338653 | -0.204812 |
| 54 | 6  | 3.792700  | -1.908058 | -2.321337 | 122 | 1 | -7.130626  | -1.326103 | 2.030073  |
| 55 | 8  | -0.770666 | -2.408042 | 1.689803  | 123 | 1 | -5.259926  | -1.051109 | 3.648603  |
| 56 | 14 | -1.801999 | -3.131565 | 0.626508  | 124 | 1 | -2.979265  | -1.802210 | 3.048768  |
| 57 | 6  | -3.517369 | -2.487911 | 1.073463  | 125 | 1 | -2.767684  | -0.718789 | -1.258765 |
| 58 | 6  | -4.587720 | -2.628569 | 0.174943  | 126 | 1 | -1.368161  | 3.259478  | -2.233825 |
| 59 | 6  | -5.874897 | -2.209574 | 0.508652  | 127 | 1 | 0.830889   | 2.218152  | -2.860077 |
| 60 | 6  | -6.120489 | -1.640259 | 1.758387  | 128 | 1 | 1.088380   | -0.281736 | -2.621958 |
| 61 | 6  | -5.073191 | -1.489821 | 2.666267  | 129 | 1 | -12.598790 | 10.485494 | 0.602739  |
| 62 | 6  | -3.788739 | -1.911072 | 2.323499  | 130 | 1 | -13.438408 | 8.302621  | 1.484558  |
| 63 | 8  | -1.536291 | -2.719585 | -0.944840 | 131 | 1 | -11.953435 | 6.281767  | 1.320053  |
| 64 | 6  | -1.758299 | -4.995518 | 0.784507  | 132 | 1 | -9.007117  | 8.813817  | -0.559074 |
| 65 | 6  | -1.861006 | -5.822921 | -0.343649 | 133 | 1 | 8.880925   | 2.613217  | -0.882492 |
| 66 | 6  | -1.901635 | -7.210054 | -0.213459 | 134 | 1 | 6.790402   | 1.083666  | -0.343059 |
| 67 | 6  | -1.839025 | -7.794234 | 1.050275  | 135 | 1 | -6.792531  | 1.079771  | 0.341104  |
| 68 | 6  | -1.729243 | -6.988155 | 2.182940  | 136 | 1 | -8.884573  | 2.607302  | 0.880279  |

**Table S13. Energy  $E$  (eV), wavelength  $\lambda$  (nm), and oscillator strength  $f$  of main ( $f \geq 0.005$ ) electronic transitions calculated for  $1_2 \cdot 2$  in the gas phase (300-400 nm), along with molecular orbital composition of the excited-state functions and molecular fragments where the involved KS-MOs are mainly localized (F-Ph = fluoro-phenyl substituents of **2**; PolyPy = polypyridyl ligand **1**).**

| Excited State | $E$ (eV) | $\lambda$ (nm) | $f$   | Composition    | %  | Molecular fragments  |
|---------------|----------|----------------|-------|----------------|----|----------------------|
| S1            | 3.100    | 400.0          | 1.100 | HOMO→LUMO      | 62 | F-Ph→PolyPy          |
|               |          |                |       | HOMO-1→LUMO+1  | 35 | F-Ph→F-Ph            |
| S3            | 3.178    | 390.1          | 2.076 | HOMO-2→LUMO+1  | 64 | F-Ph + PolyPy→PolyPy |
|               |          |                |       | HOMO-3→LUMO+1  | 33 | F-Ph + PolyPy→PolyPy |
| S4            | 3.342    | 382.4          | 0.059 | HOMO-3→LUMO    | 56 | F-Ph + PolyPy→PolyPy |
|               |          |                |       | HOMO-2→LUMO+1  | 34 | F-Ph + PolyPy→PolyPy |
| S8            | 3.434    | 361.1          | 0.046 | HOMO-3→LUMO+1  | 51 | F-Ph + PolyPy→PolyPy |
|               |          |                |       | HOMO-2→LUMO    | 29 | F-Ph + PolyPy→PolyPy |
|               |          |                |       | HOMO-1→LUMO+1  | 11 | F-Ph→F-Ph            |
| S21           | 3.830    | 323.7          | 0.006 | HOMO-10→LUMO   | 56 | F-Ph→F-Ph            |
|               |          |                |       | HOMO-11→LUMO+1 | 19 | F-Ph→F-Ph            |
| S23           | 3.857    | 321.4          | 0.079 | HOMO-2→LUMO+2  | 34 | F-Ph + PolyPy→PolyPy |
|               |          |                |       | HOMO-3→LUMO+3  | 21 | F-Ph + PolyPy→PolyPy |
|               |          |                |       | HOMO→LUMO+2    | 15 | F-Ph→PolyPy          |

**Electronic Supplementary Information (ESI)**

**Figure S1: Ellipsoid draw (30%) and numbering scheme for compound 1. H-atoms omitted for clarity.**

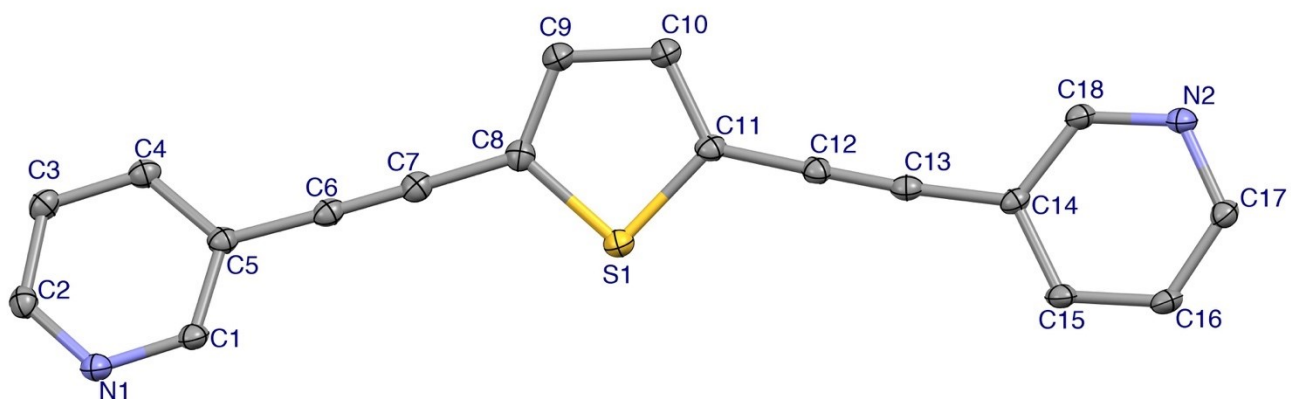

**Figure S2: Ellipsoid draw (30%) and numbering scheme for compound 2. H-atoms omitted for clarity.**

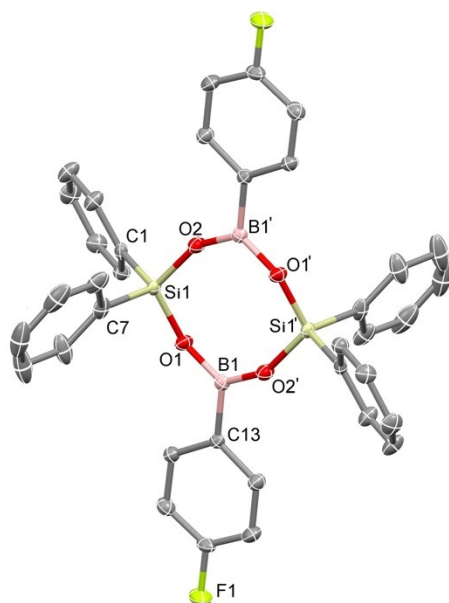

**Electronic Supplementary Information (ESI)**

**Figure S3: Ellipsoid draw (30%) and numbering scheme for compound 3. H-atoms omitted for clarity.**

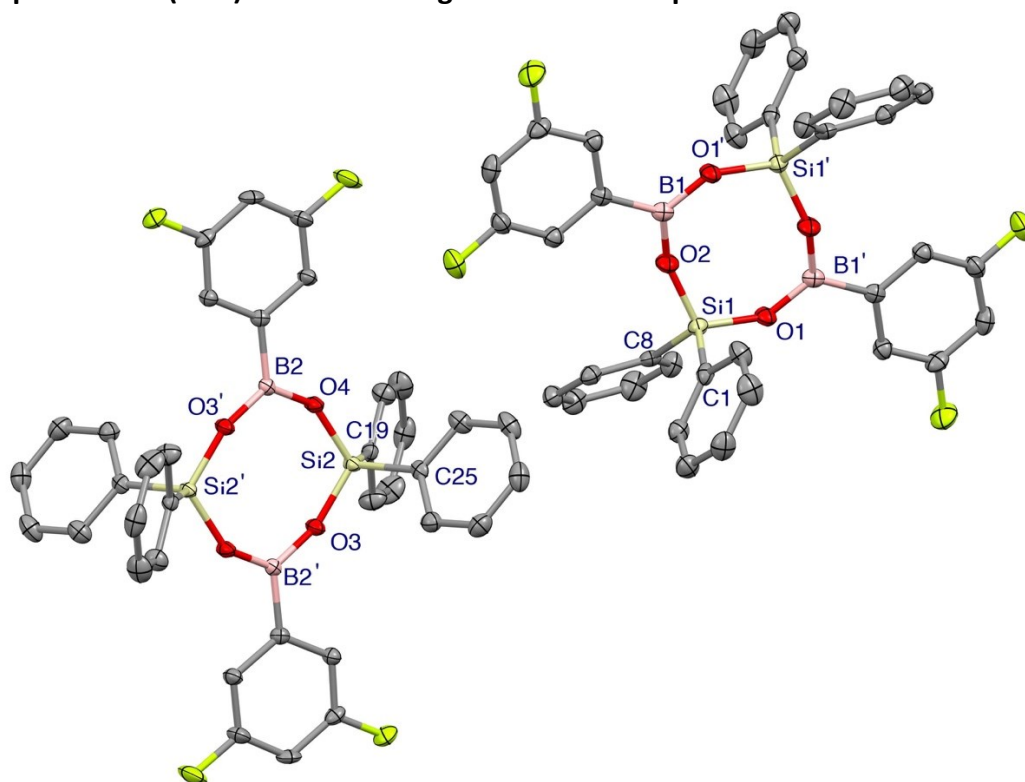

**Figure S4: Asymmetric unit and numbering scheme for compound 4. H-atoms omitted for clarity.**

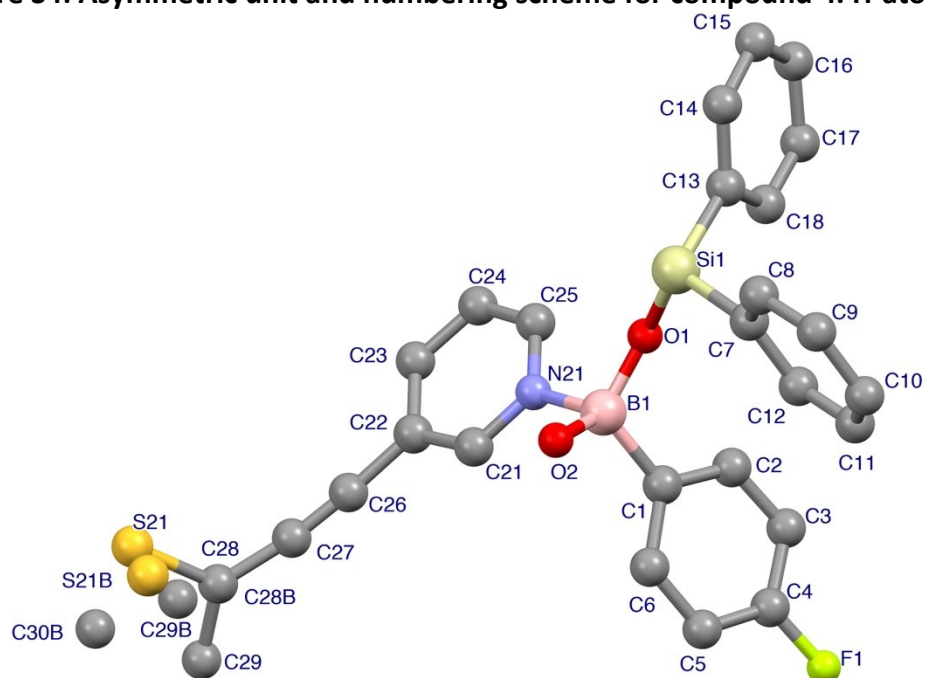





Figure S7: FT-IR spectrum of 2

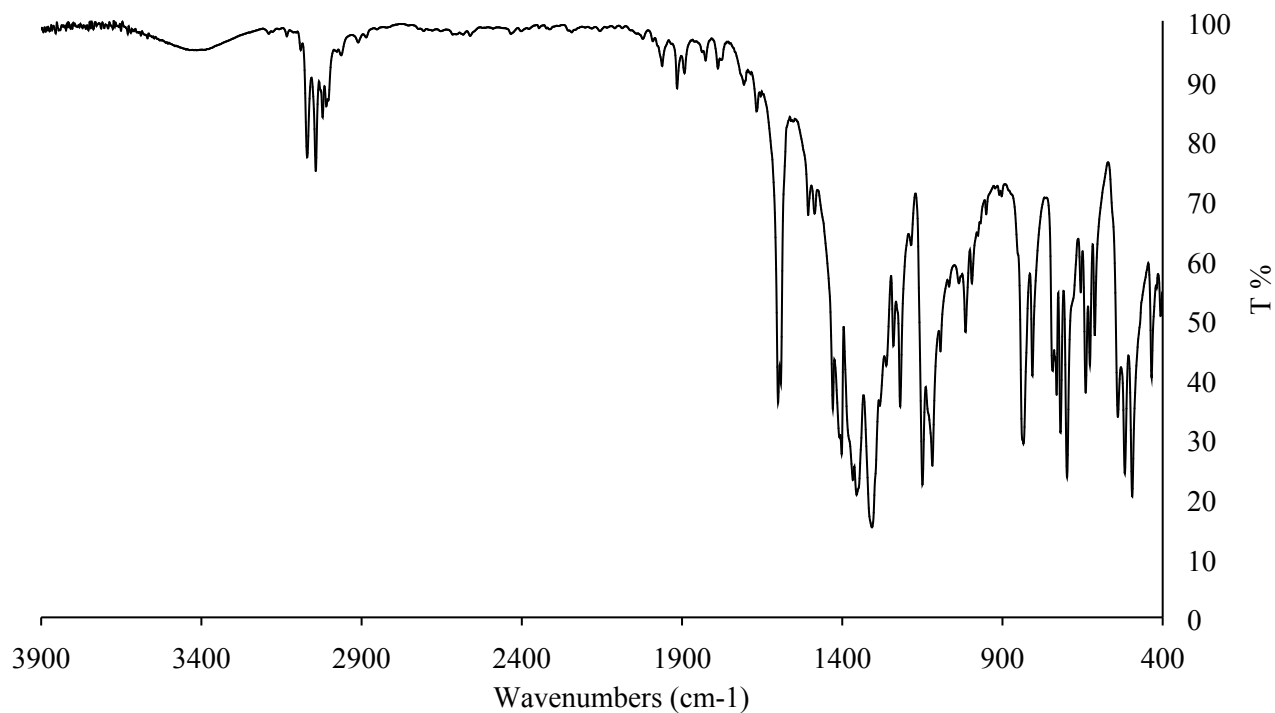

Figure S8: FT-IR spectrum of 3

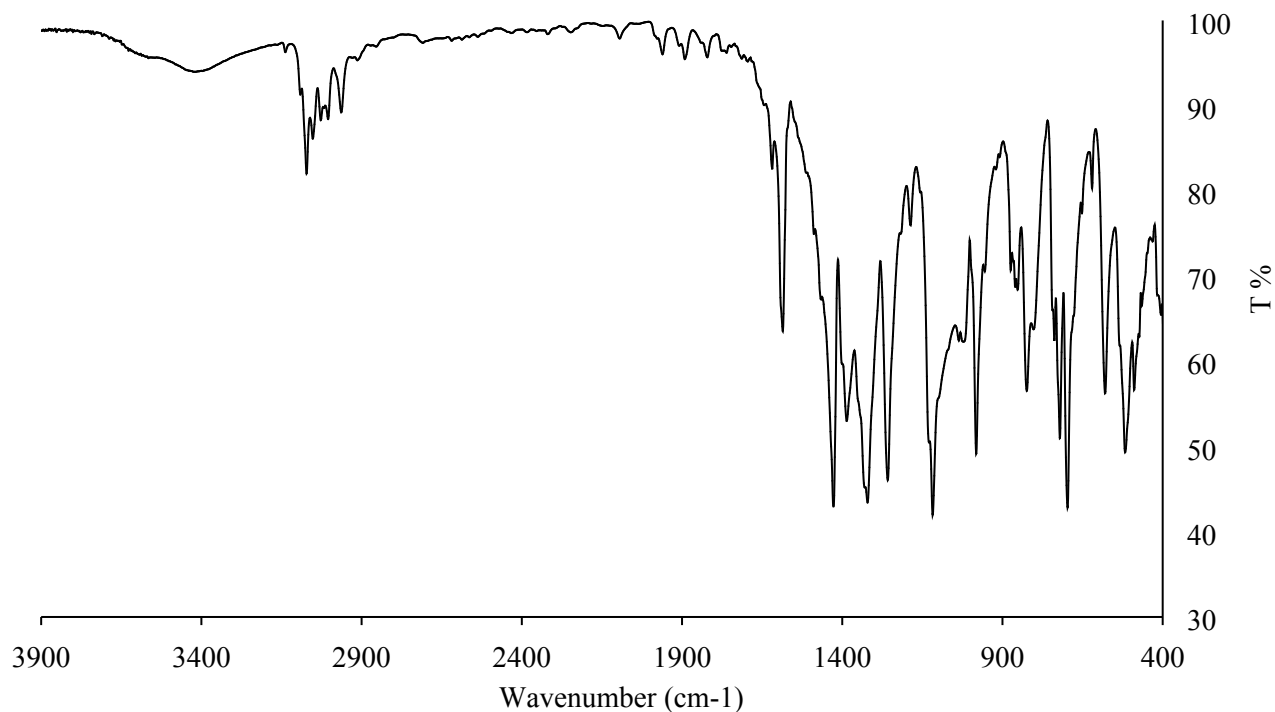

Figure S9: FT-IR spectrum of 4

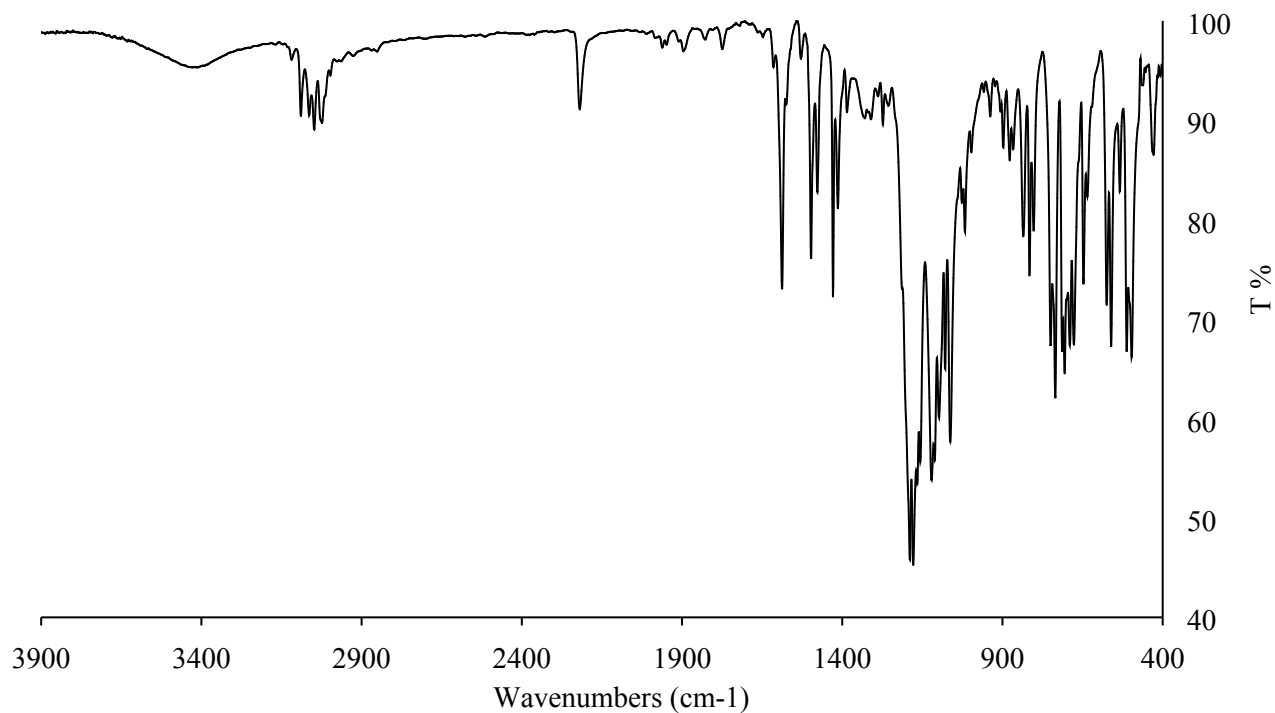

Figure S10: FT-IR spectrum of 5

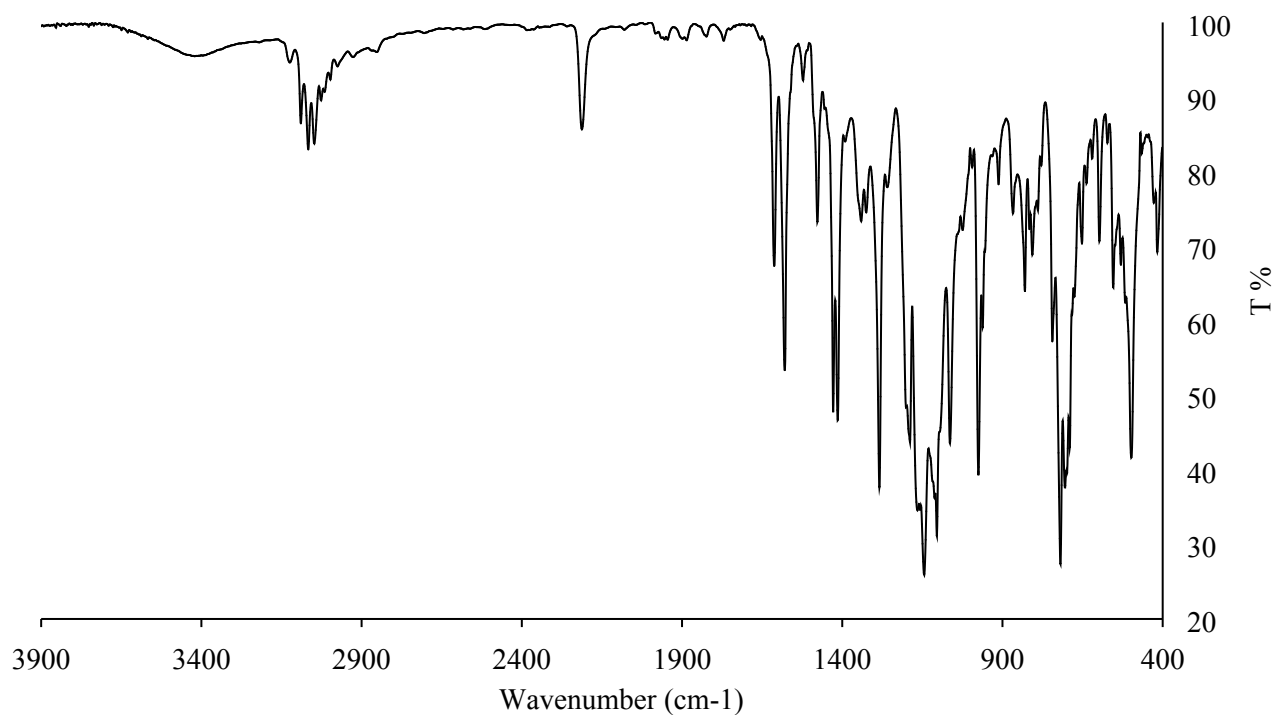

Figure S11. Diffuse reflectance measurements for compounds 1-5

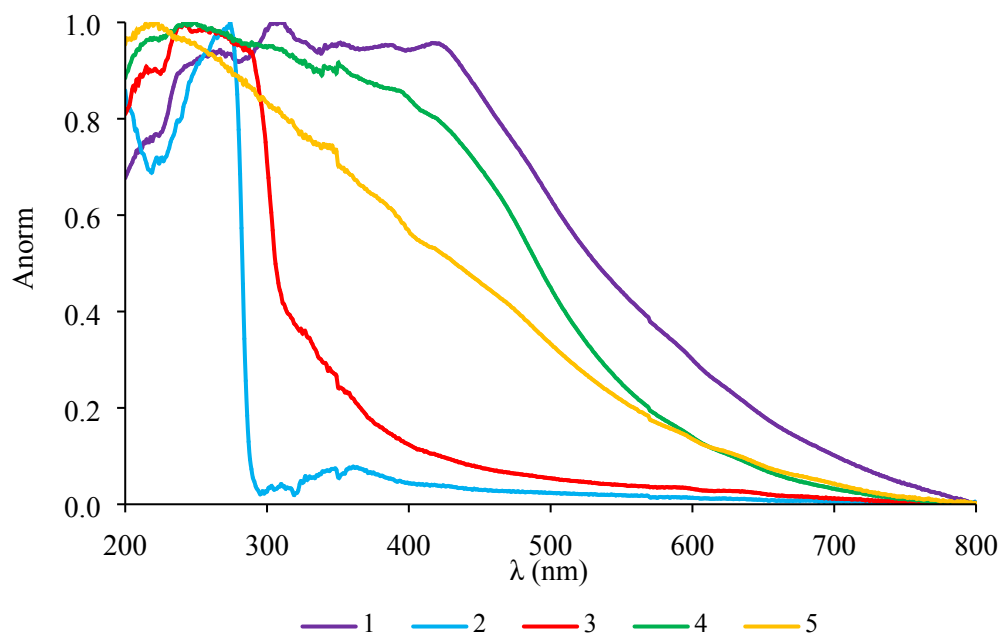

NMR Spectra

Figure S12:  $^1\text{H-NMR}$  (400 MHz,  $\text{DMSO-d}_6$ ) of 1

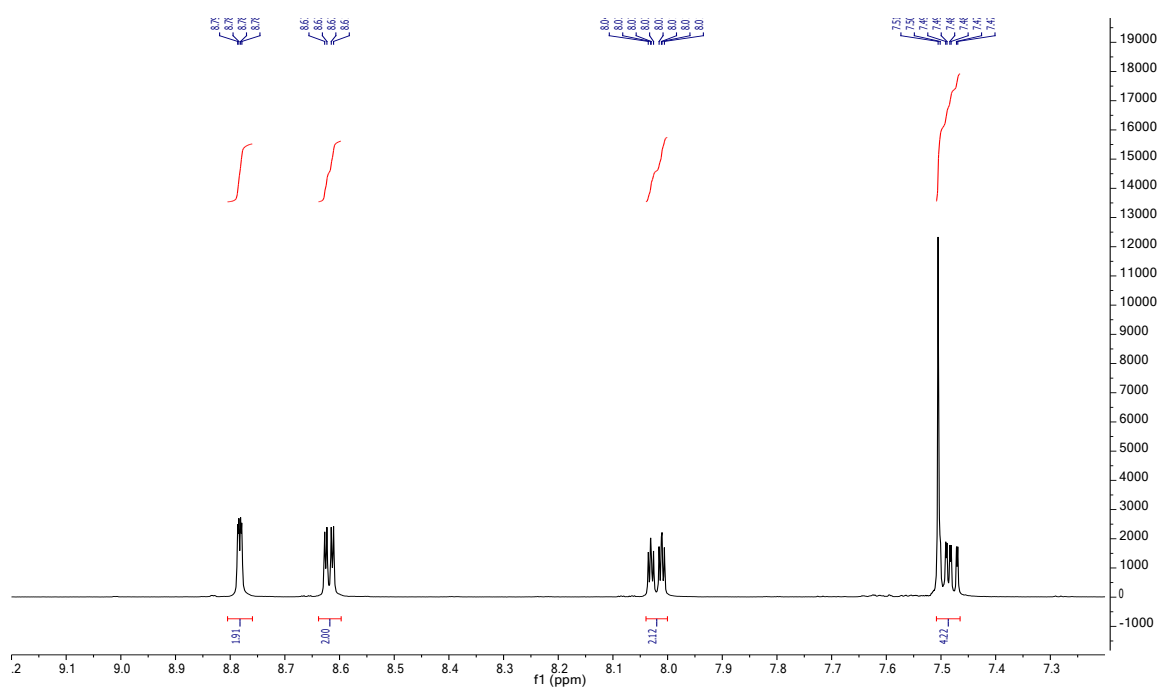

**Electronic Supplementary Information (ESI)**

**Figure S13:  $^{13}\text{C}\{^1\text{H}\}$  NMR (101 MHz,  $\text{DMSO-d}_6$ ) of **1****

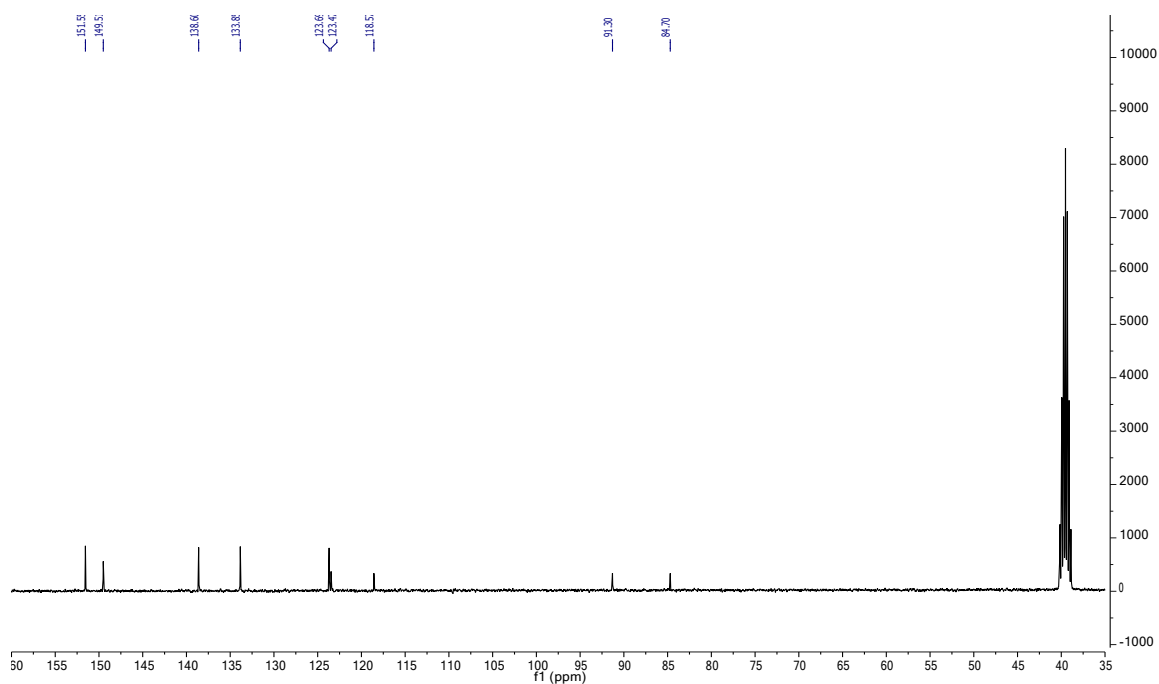

**Figure S14:  $^1\text{H}$ - $^1\text{H}$  COSY NMR of **1****

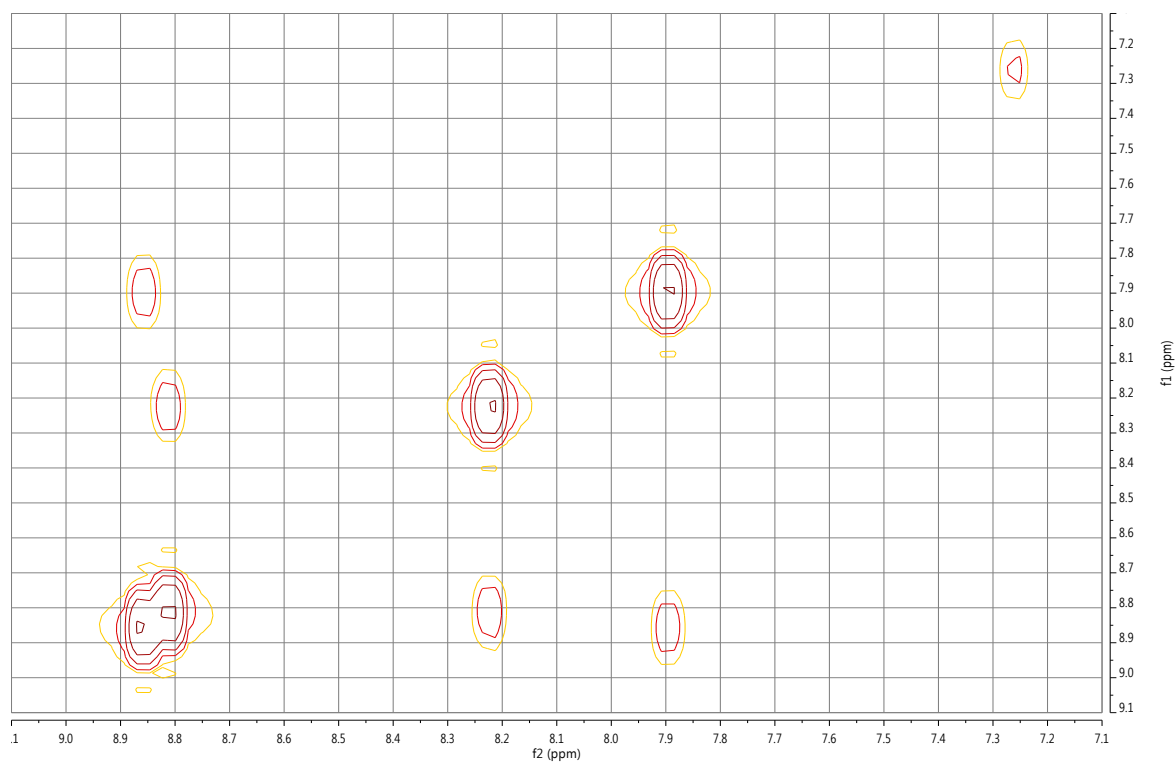

### Electronic Supplementary Information (ESI)

Figure S15:  $^1\text{H-NMR}$  (400 MHz,  $\text{CDCl}_3$ ) of 2

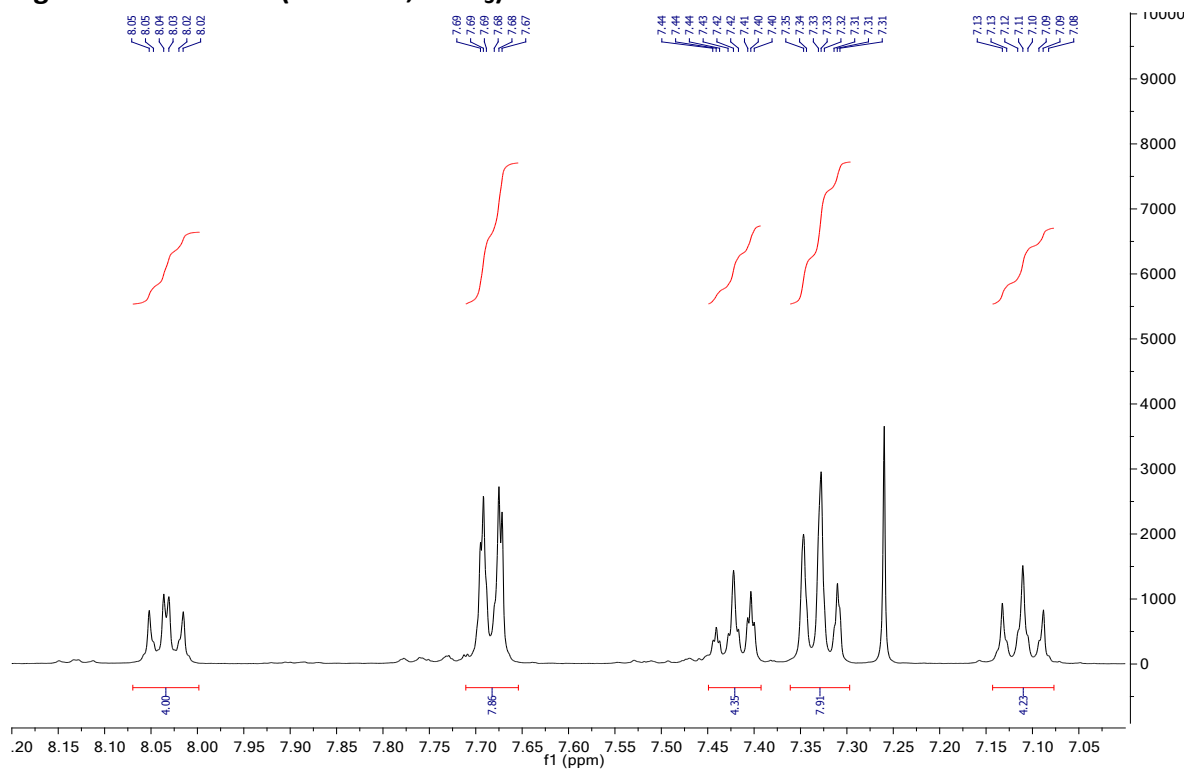

Figure S16:  $^{13}\text{C}\{^1\text{H}\}$  NMR (101 MHz,  $\text{CDCl}_3$ ) of 2

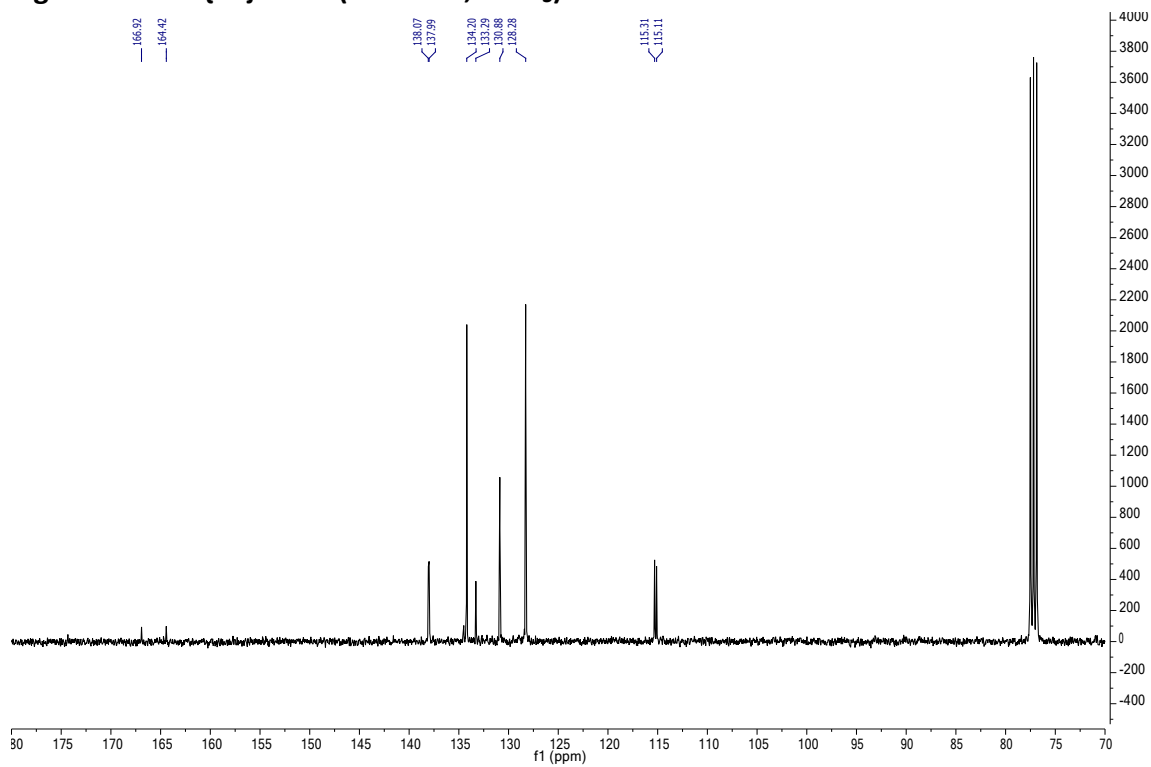

**Electronic Supplementary Information (ESI)**

**Figure S17:  $^{11}\text{B}\{^1\text{H}\}$  NMR (128 MHz,  $\text{CDCl}_3$ ) of 2**

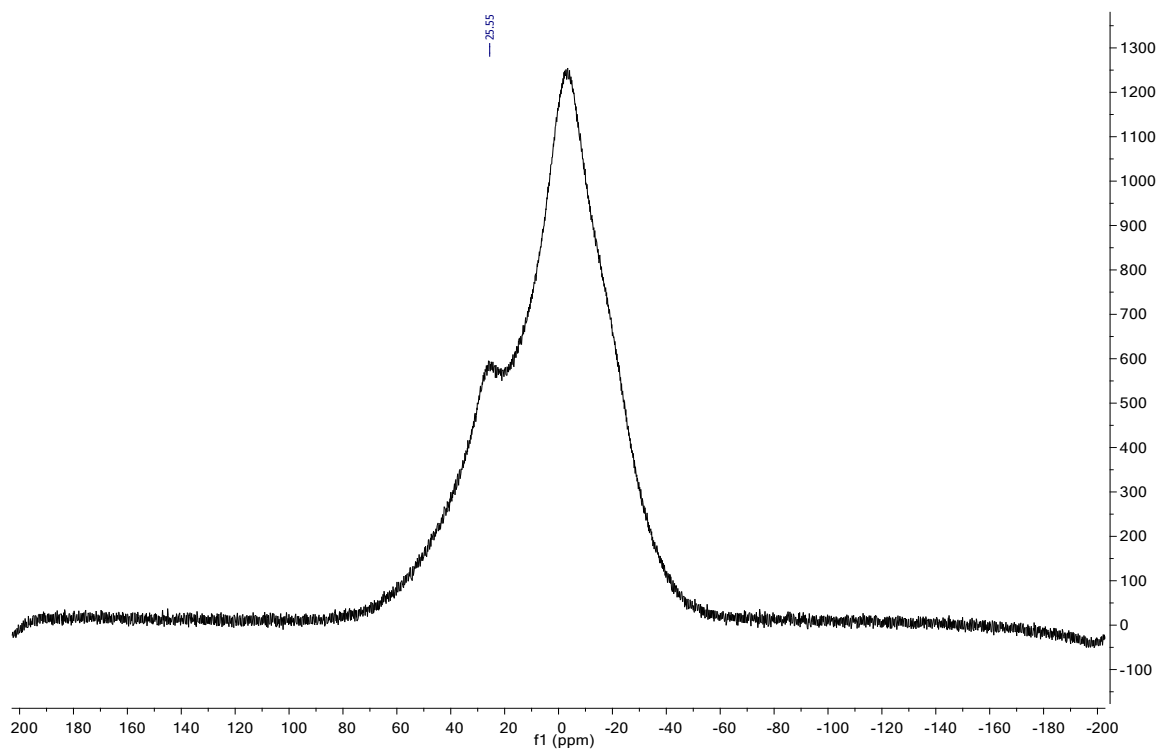

Electronic Supplementary Information (ESI)

Figure S18:  $^{19}\text{F}\{^1\text{H}\}$  NMR (377 MHz,  $\text{CDCl}_3$ ) of 2

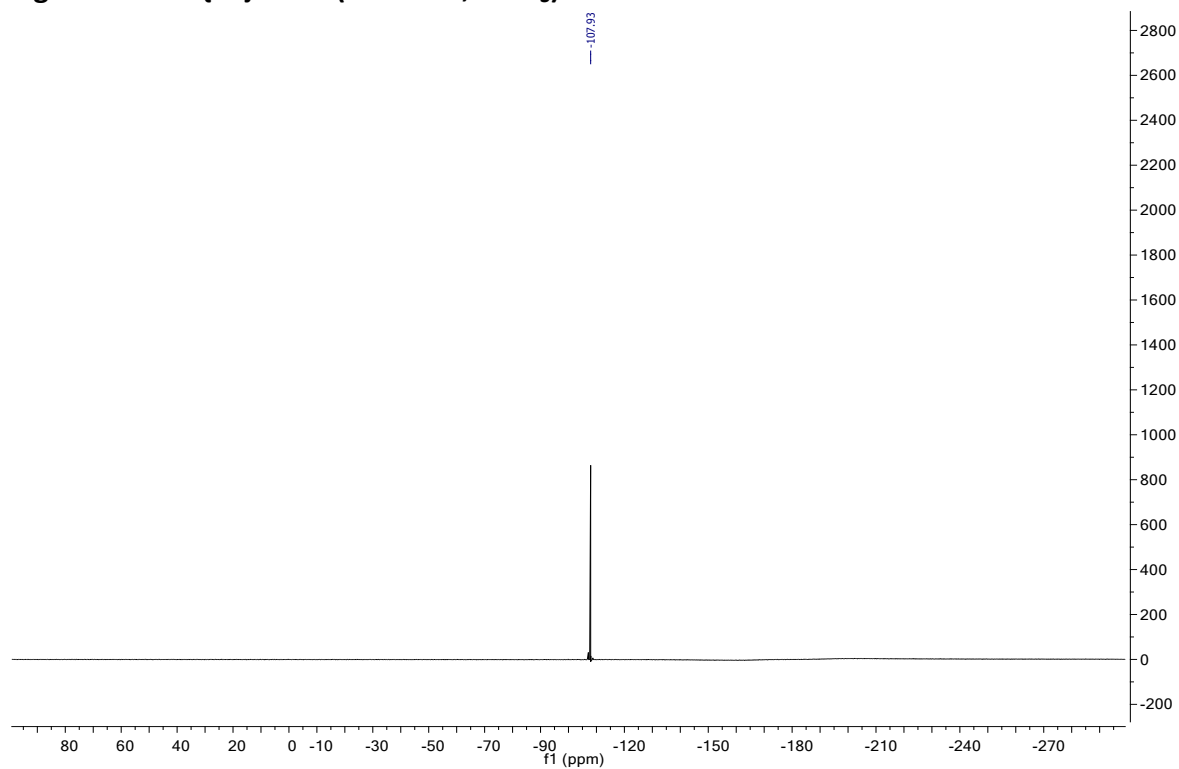

Figure S19.  $^{29}\text{Si}\{^1\text{H}\}$  NMR (80 MHz,  $\text{CDCl}_3$ ) of 2

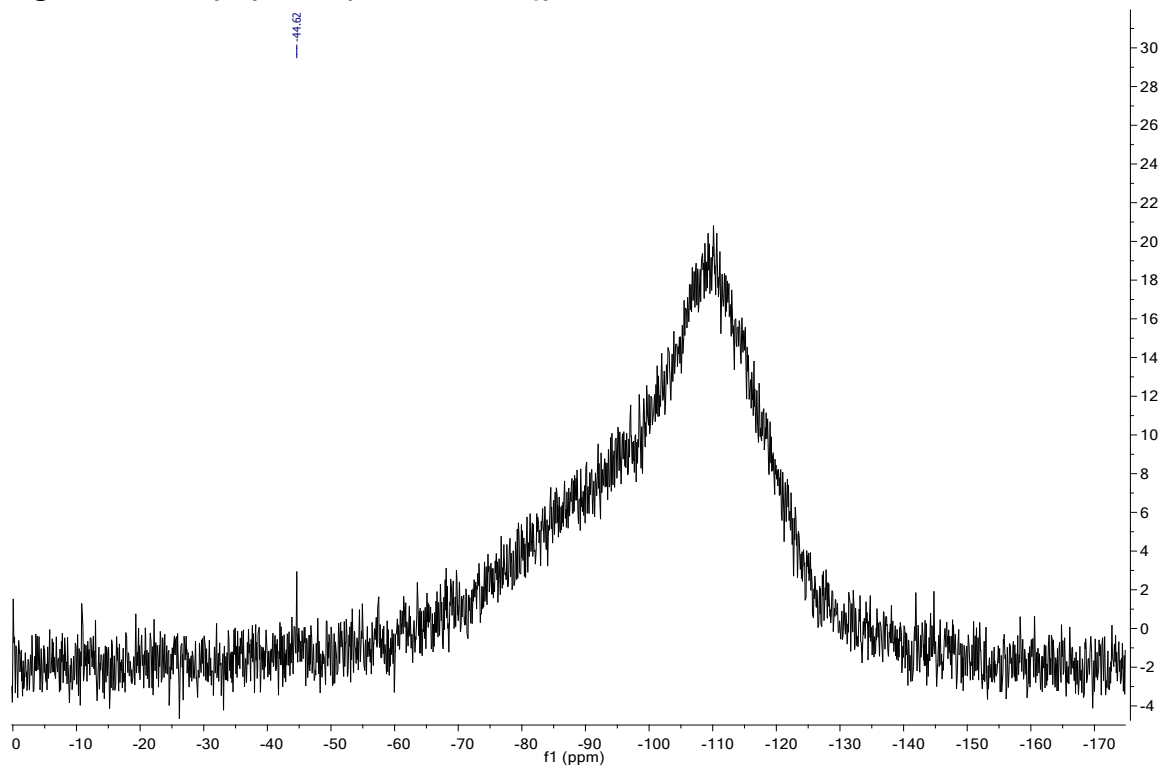



Electronic Supplementary Information (ESI)

Figure S20:  $^1\text{H-NMR}$  (400 MHz,  $\text{CDCl}_3$ ) of 3

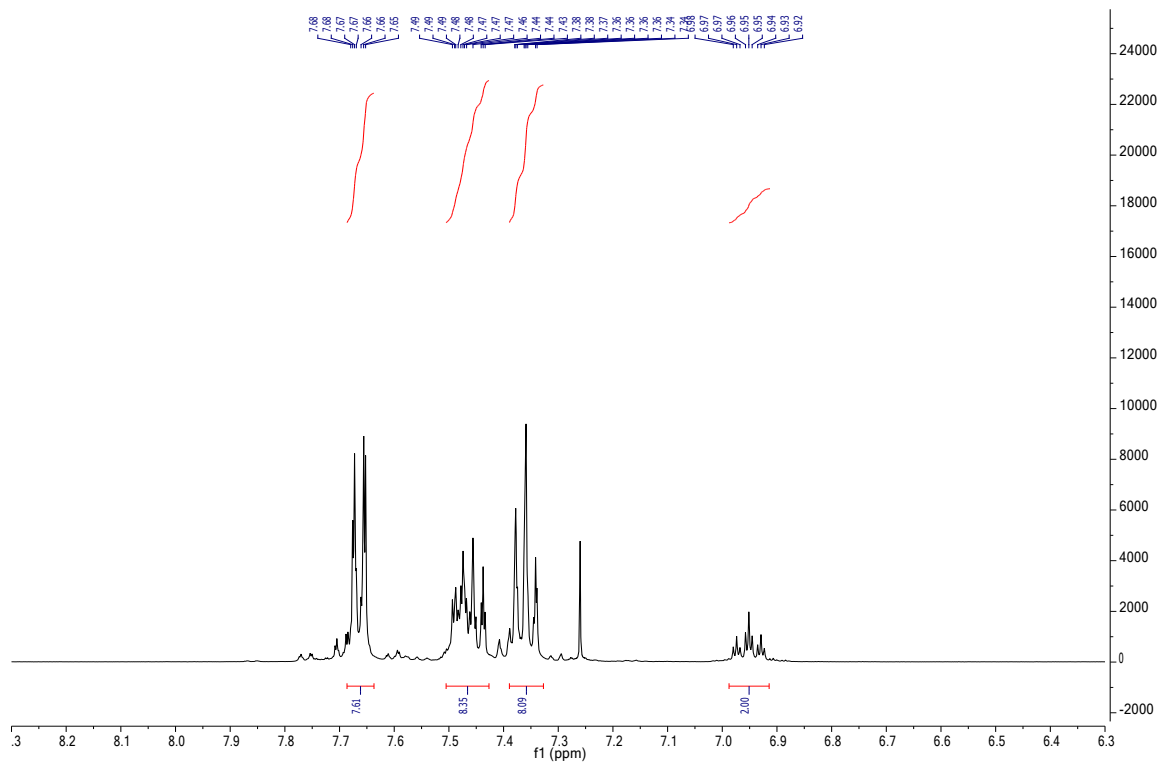

Figure S21  $^{13}\text{C}\{^1\text{H}\}$  NMR (101 MHz,  $\text{CDCl}_3$ ) of 3

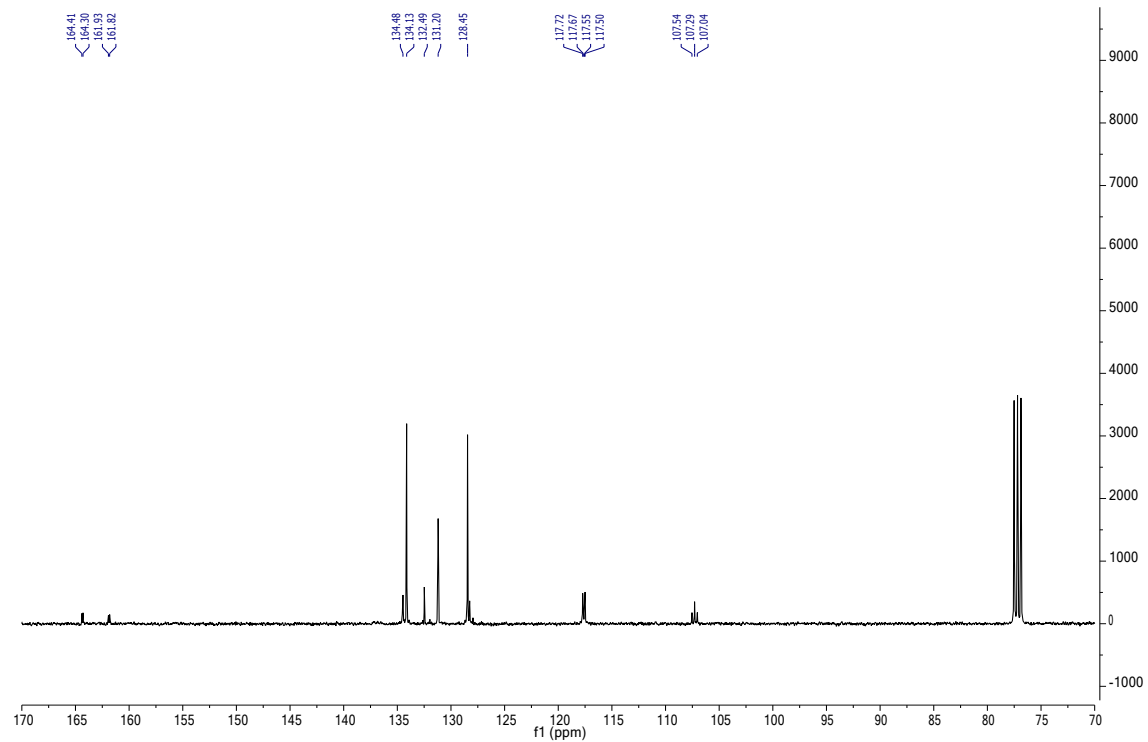

**Electronic Supplementary Information (ESI)**

**Figure S22:  $^{11}\text{B}\{^1\text{H}\}$  NMR (128 MHz,  $\text{CDCl}_3$ ) of 3**

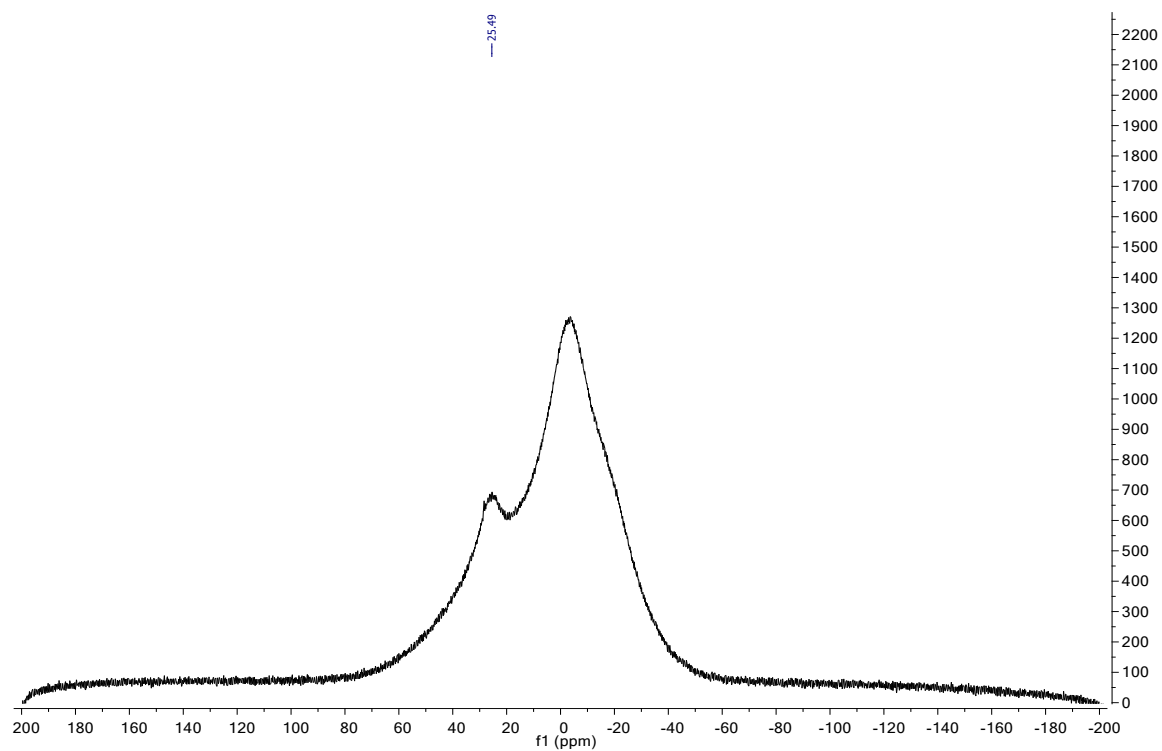

Electronic Supplementary Information (ESI)

Figure S23:  $^{19}\text{F}\{^1\text{H}\}$  NMR (377 MHz,  $\text{CDCl}_3$ ) of 3

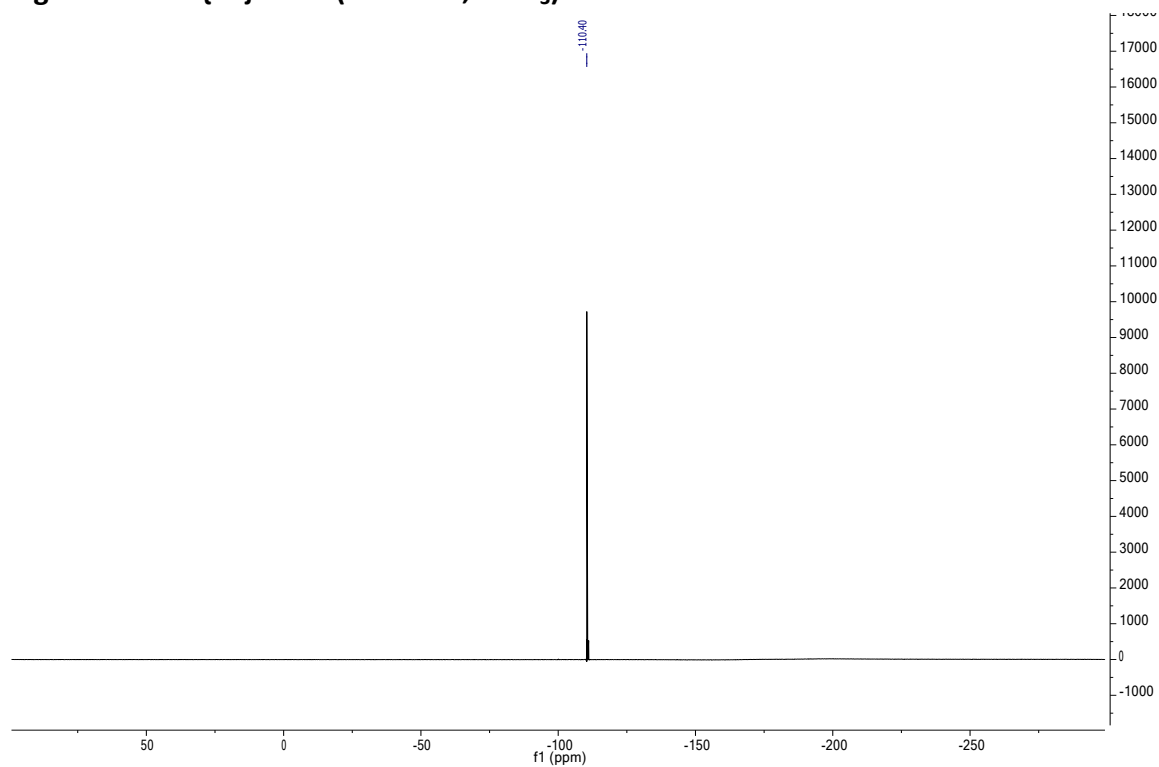

Figure S24:  $^{29}\text{Si}\text{-}^1\text{H}$  HMBC of 3

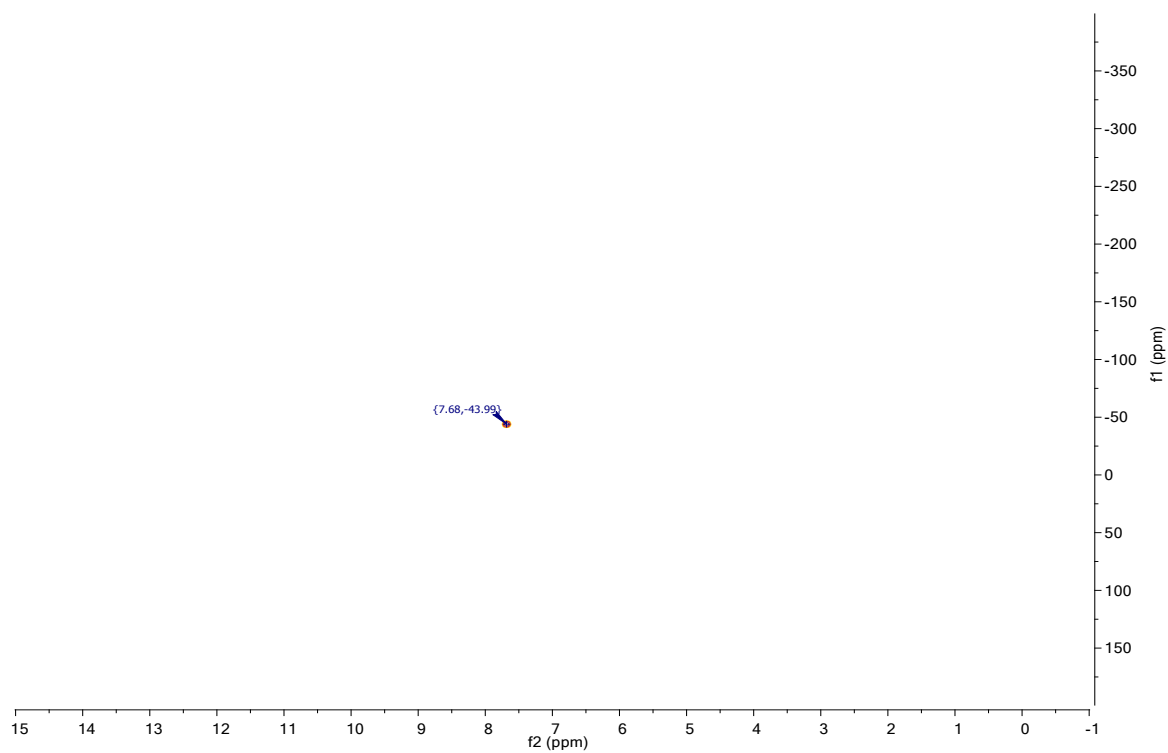

**Electronic Supplementary Information (ESI)**

**Figure S25:  $^{13}\text{C}$  CP MAS of 4**

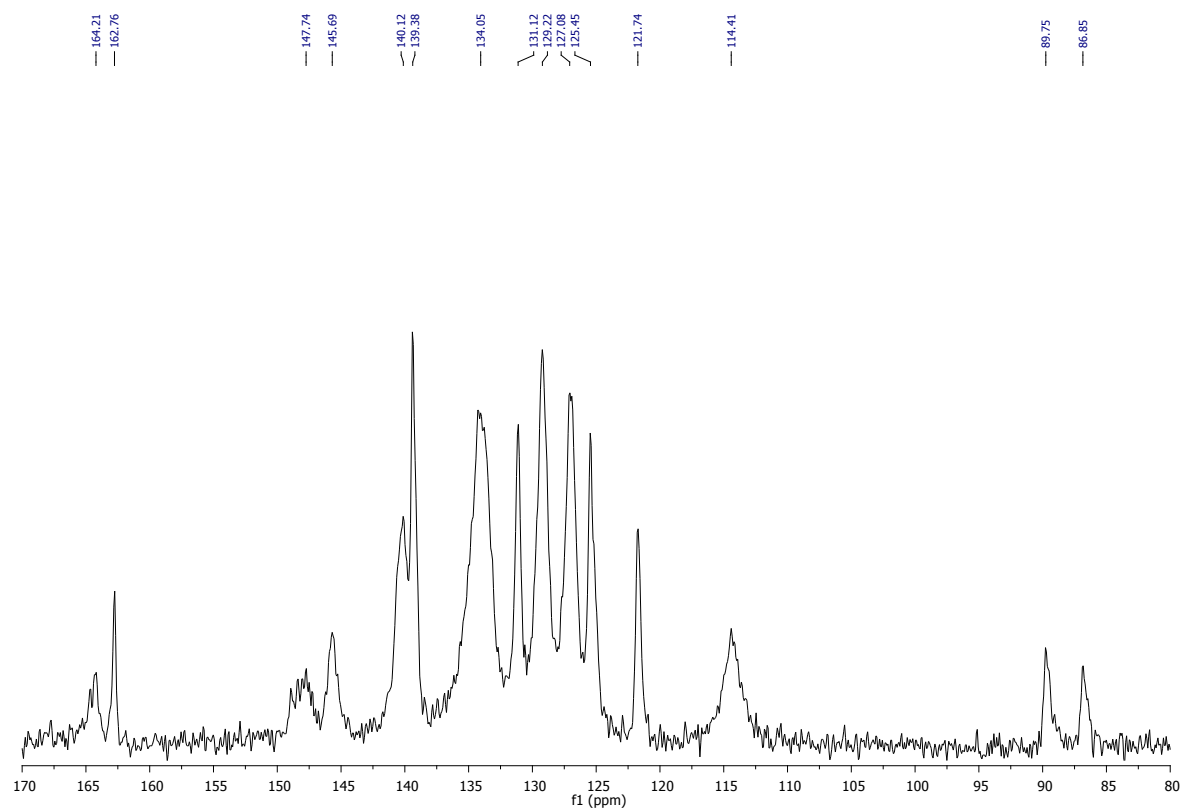

## Electronic Supplementary Information (ESI)

Figure S26:  $^{13}\text{C}$  CP MAS of 5

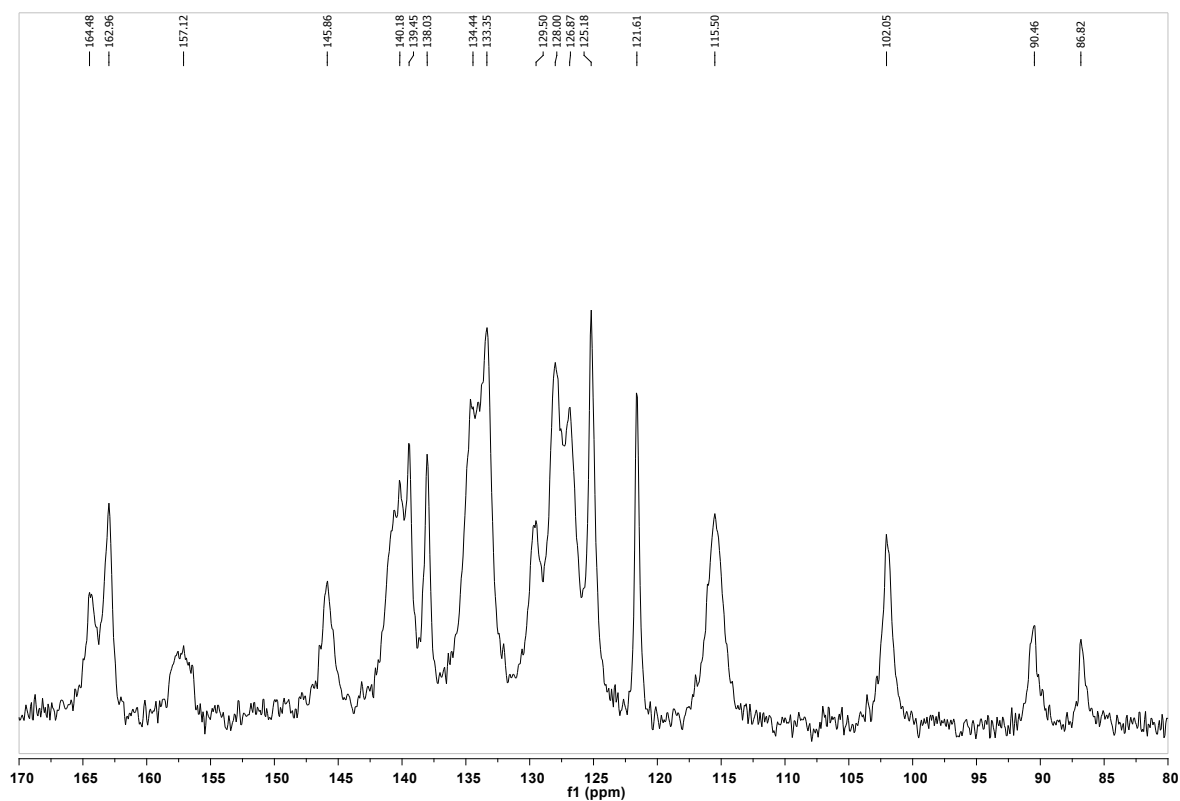

## Mass spectra

Figure S27: TOF MS ES+ of 1

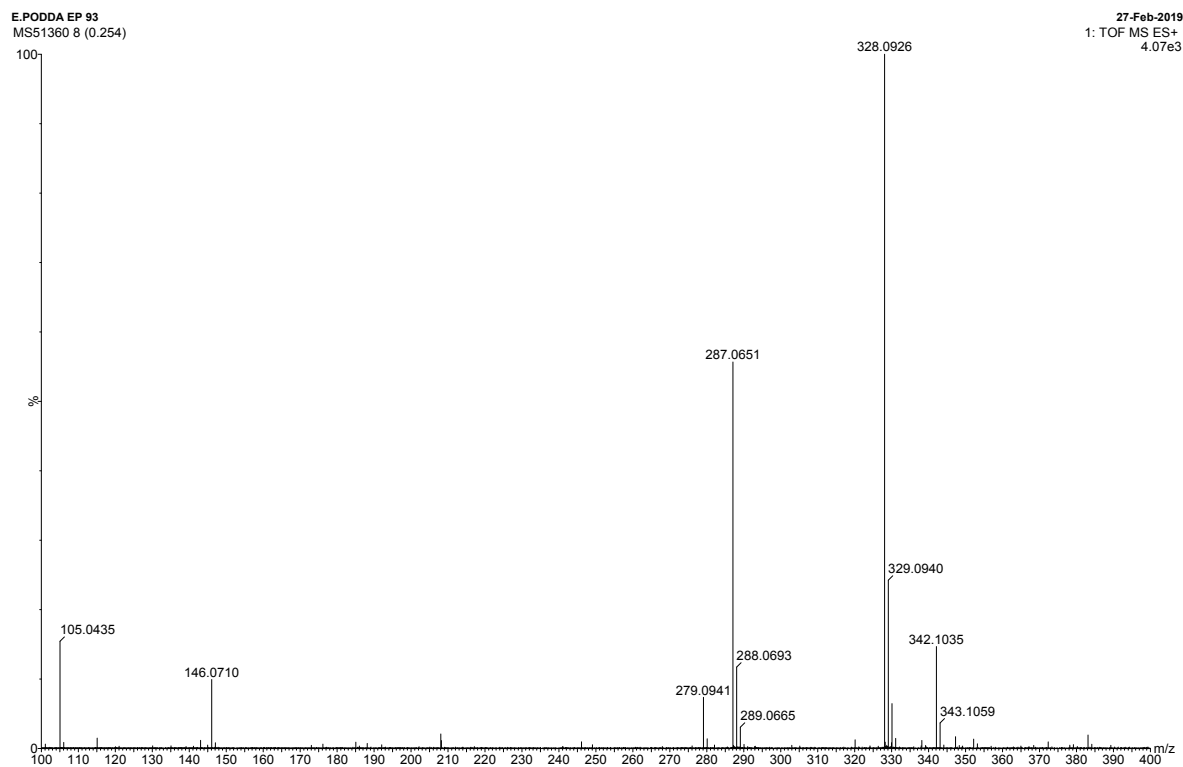

## Electronic Supplementary Information (ESI)

### Powder X-ray Diffraction analysis

Figure S28: Comparison between the experimental (red) and calculated (blue) PXRD pattern of compound 4

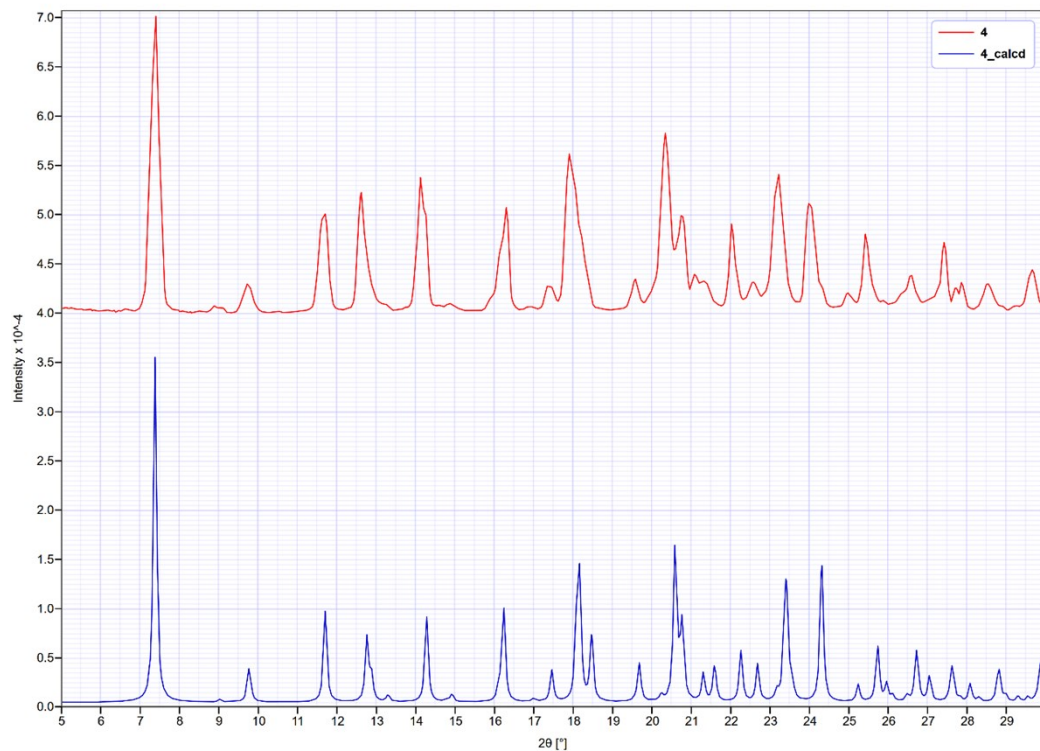

**Electronic Supplementary Information (ESI)**

**Figure S29: Comparison between the experimental (red) and calculated (blue) PXRD pattern of compound 5**

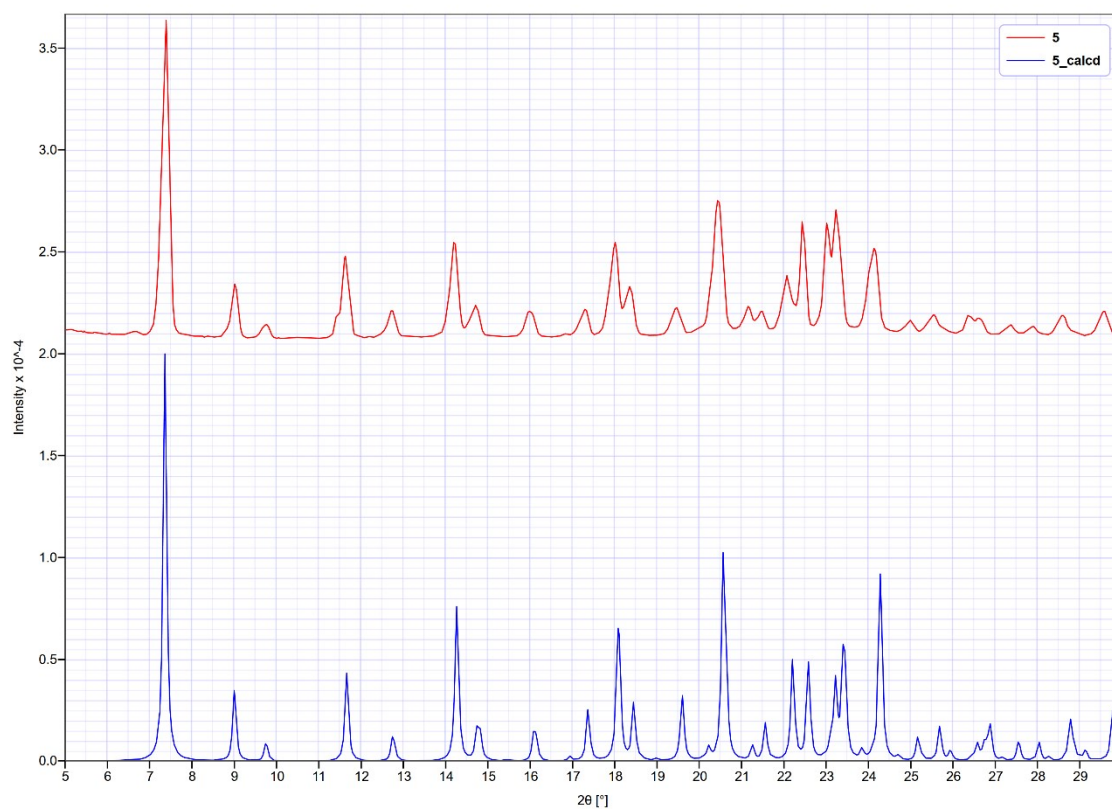

Figure S30: Relative total electronic energy variation ( $\Delta E$ ) calculated as a function of the pyridine ring

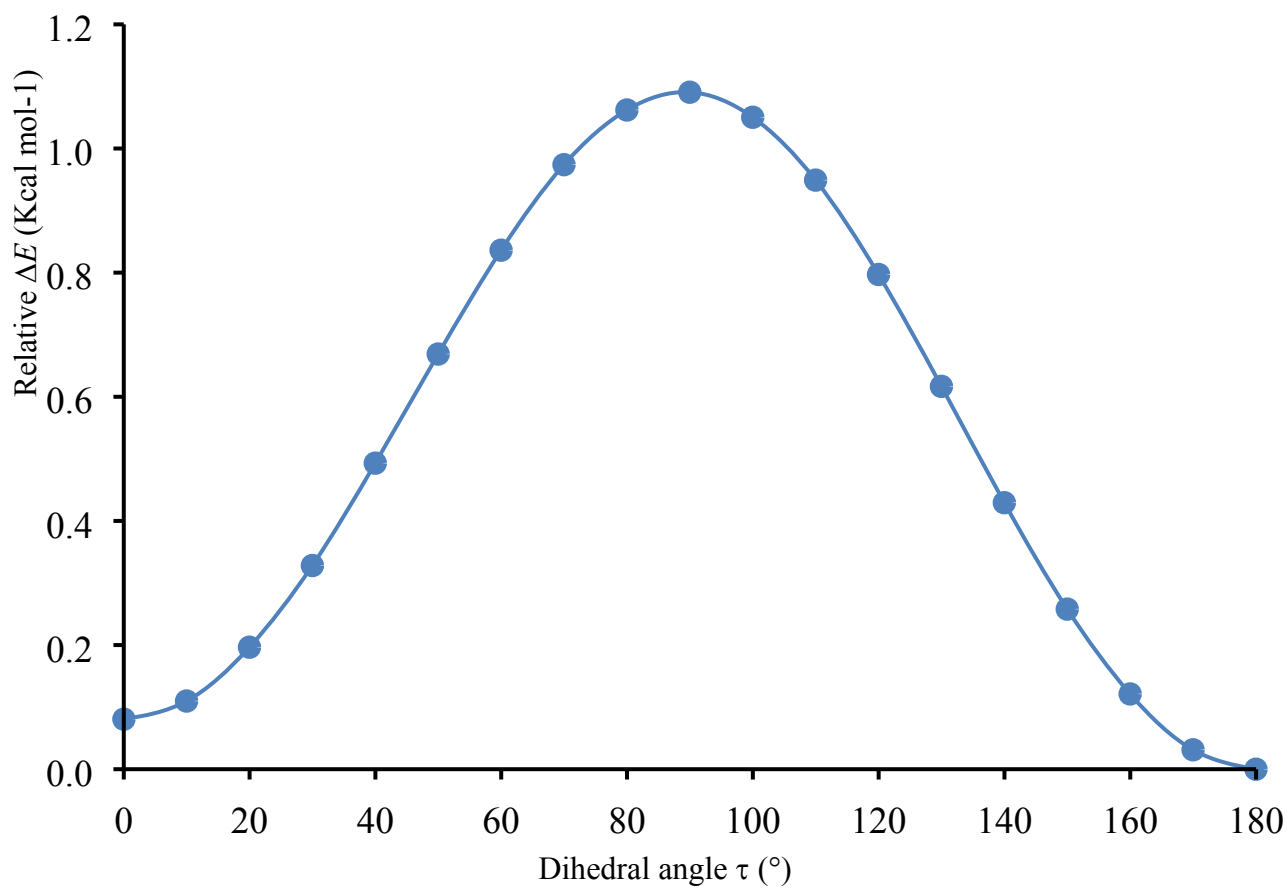

rotation ( $\tau$ ) for 1.



Figure S31: Isosurface drawings of selected frontier Kohn–Sham molecular orbitals calculated for 1, 2, and 3 at the optimized geometry. Hydrogen atoms were omitted for clarity. Cutoff value = 0.05 |e|.

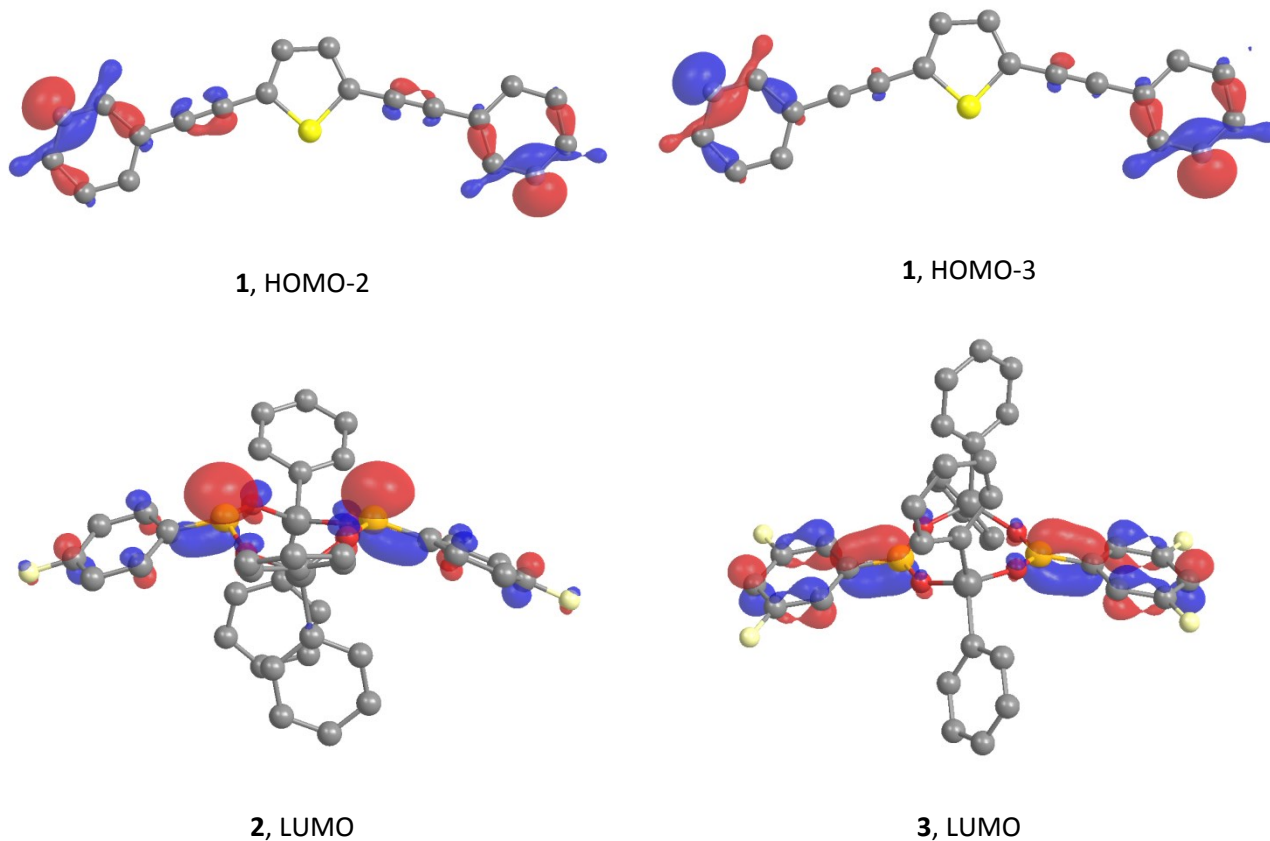

## References

- 1 CrysAlisPro Software System, Rigaku Oxford Diffraction, (2020).
- 2 G. M. Sheldrick, ShelXT-Integrated space-group and crystal-structure determination, *Acta Crystallogr. Sect. A Found. Crystallogr.*, 2015, **71**, 3–8.
- 3 O. V. Dolomanov, L. J. Bourhis, R. J. Gildea, J. A. K. Howard and H. Puschmann, *J. Appl. Crystallogr.*, 2009, **42**, 339–341.
- 4 G. M. Sheldrick, Crystal structure refinement with ShelXL, *Acta Crystallogr. Sect. C Struct. Chem.*, 2015, **71**, 3–8.
- 5 CrysAlis Pro: Agilent, 2014, Agilent Technologies Ltd, Yarnton, Oxfordshire, UK.

### Electronic Supplementary Information (ESI)

- 6 G.M. Sheldrick, A short history of SHELX. *Acta Crystallogr. Sect. A*, 2008, **64**, 112.
- 7 Farrugia, L. J. WinGX and ORTEP for Windows: an update. *J. Appl. Cryst.*, **2012**, *45*, 849.
- 8 W. Koch and M. C. Holthausen, *A chemist's guide to density functional theory*, Wiley-VCH, 2001.
- 9 M. J. Frisch, G. W. Trucks, H. B. Schlegel, G. E. Scuseria, M. A. Robb, J. R. Cheeseman, G. Scalmani, V. Barone, G. A. Petersson, H. Nakatsuji, X. Li, M. Caricato, A. V. Marenich, J. Bloino, B. G. Janesko, R. Gomperts, B. Mennucci, H. P. Hratchian, J. V. Ortiz, A. F. Izmaylov, J. L. Sonnenberg, D. Williams-Young, F. Ding, F. Lipparini, F. Egidi, J. Goings, B. Peng, A. Petrone, T. Henderson, D. Ranasinghe, V. G. Zakrzewski, J. Gao, N. Rega, G. Zheng, W. Liang, M. Hada, M. Ehara, K. Toyota, R. Fukuda, J. Hasegawa, M. Ishida, T. Nakajima, Y. Honda, O. Kitao, H. Nakai, T. Vreven, K. Throssell, J. J. A. Montgomery, J. E. Peralta, F. Ogliaro, M. Bearpark, J. J. Heyd, E. N. Brothers, K. N. Kudin, V. N. Staroverov, T. Keith, R. Kobayashi, J. Normand, K. Raghavachari, A. P. Rendell, J. C. Burant, S. S. Iyengar, J. Tomasi, M. Cossi, J. M. Millam, M. Klene, C. Adamo, R. Cammi, J. W. Ochterski, R. L. Martin, K. Morokuma, O. Farkas, J. B. Foresman and D. J. Fox, *Gaussian 16, Rev. B.01, Wallingford, CT, 2016*.
- 10 C. Adamo and V. Barone, *J. Chem. Phys.*, 1998, **108**, 664–675.
- 11 A. Schäfer, H. Horn and R. Ahlrichs, *J. Chem. Phys.*, 1992, **97**, 2571–2577.
- 12 F. Weigend and R. Ahlrichs, *Phys. Chem. Chem. Phys.*, 2005, **7**, 3297–3305.
- 13 K. L. Schuchardt, B. T. Didier, T. Elsethagen, L. Sun, V. Gurumoorthi, J. Chase, J. Li and T. L. Windus, *J. Chem. Inf. Model.*, 2007, **47**, 1045–1052.
- 14 A. E. Reed, R. B. Weinstock and F. Weinhold, *J. Chem. Phys.*, 1985, **83**, 735–746.
- 15 R. D. Dennington, T. A. Keith and J. M. Millam, *Inc., Shawnee Mission KS*.
- 16 G. Schaftenaar and J. H. Noordik, *J. Comput. Aided. Mol. Des.*, 2000, **14**, 123–134.
- 17 L. V Skripnikov, 2017.
